# Supplementary material for: Asymmetric synthesis of new chiral N-sulfinyl 2,2-disubstituted aziridines by Grignard additions across α-chloro N-sulfinyl ketimines
Source: Royal Society of Chemistry journal article supplement (doi:10.1039/c001471k), 2010-01-01

# **Asymmetric Synthesis of New Chiral *N*-Sulfinyl 2,2-Disubstituted Aziridines by Grignard Additions across $\alpha$ -Chloro *N*-Sulfinyl Ketimines**

Filip Colpaert, Sven Mangelinckx,<sup>1</sup> Erika Leemans, Bram Denolf and Norbert De Kimpe\*

*Department of Organic Chemistry, Faculty of Bioscience Engineering, Ghent University,  
Coupure Links 653, B-9000 Ghent, Belgium*

*norbert.dekimpe@UGent.be*

## **Supporting Information**

### ***Table of Contents***

|                                                                                                         |     |
|---------------------------------------------------------------------------------------------------------|-----|
| I. Copies of <sup>1</sup> H NMR and <sup>13</sup> C NMR spectra of <b>2, 5, 6, 7</b> and <b>8</b> ..... | S-2 |
|---------------------------------------------------------------------------------------------------------|-----|

---

<sup>1</sup> Postdoctoral Fellow of the Research Foundation – Vlaanderen (FWO)

# I. Copies of $^1\text{H}$ NMR and $^{13}\text{C}$ NMR spectra of 2, 5, 6, 7 and 8

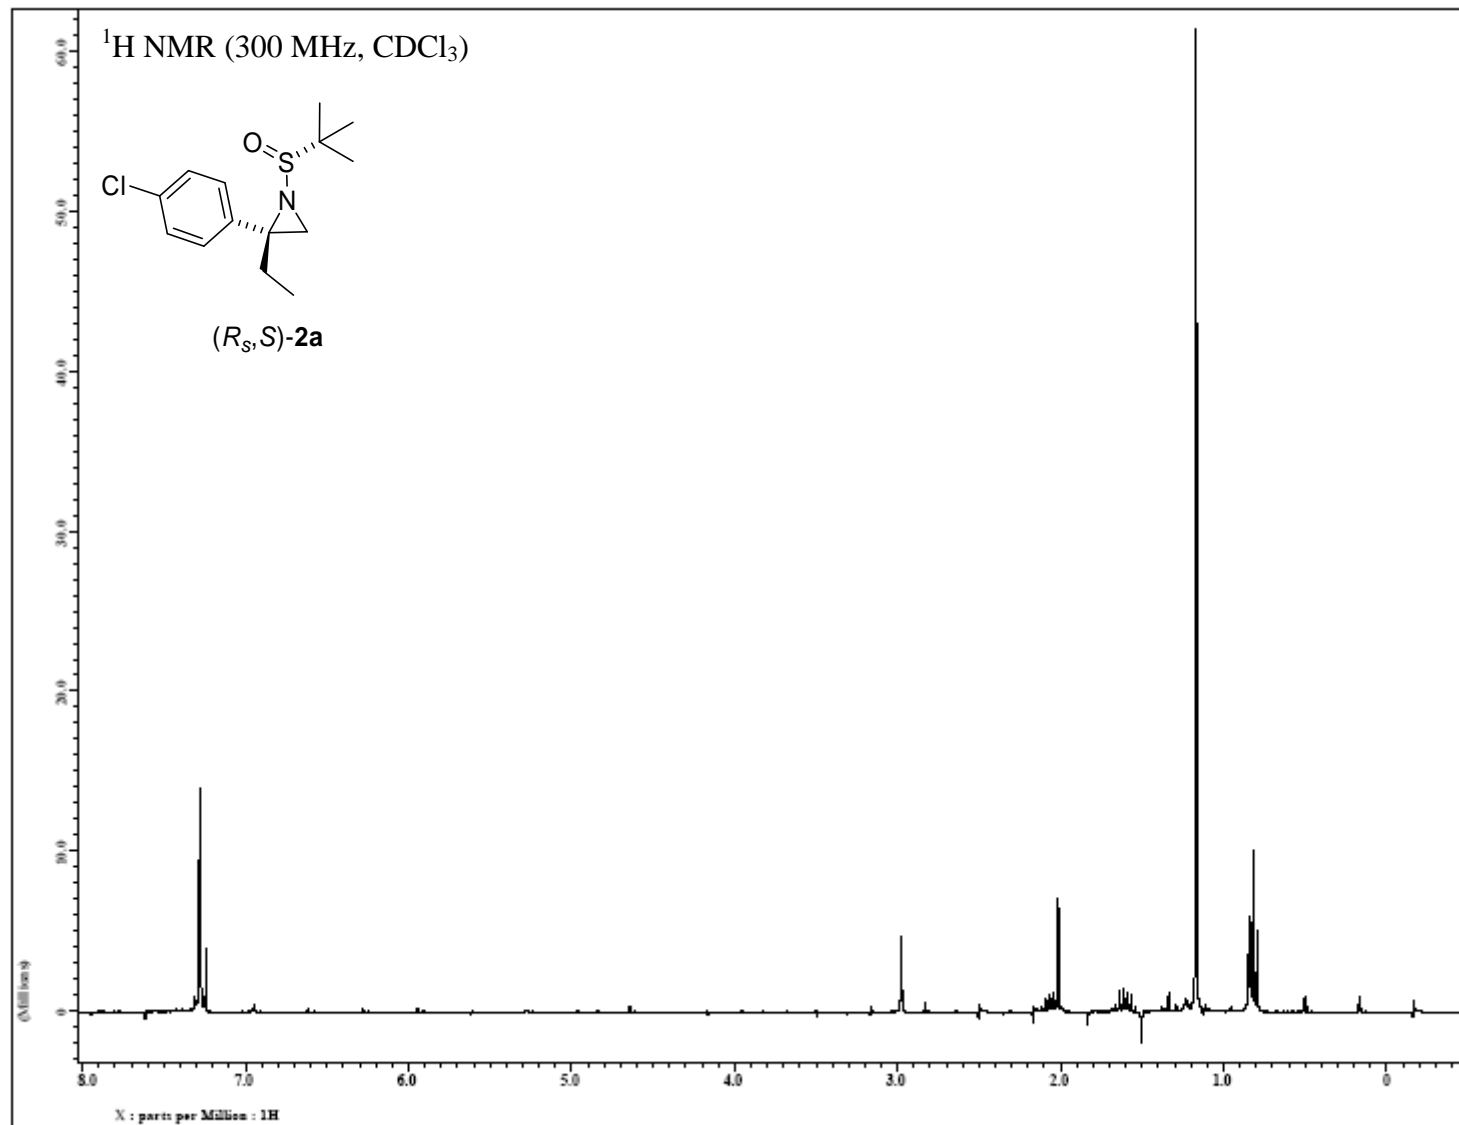

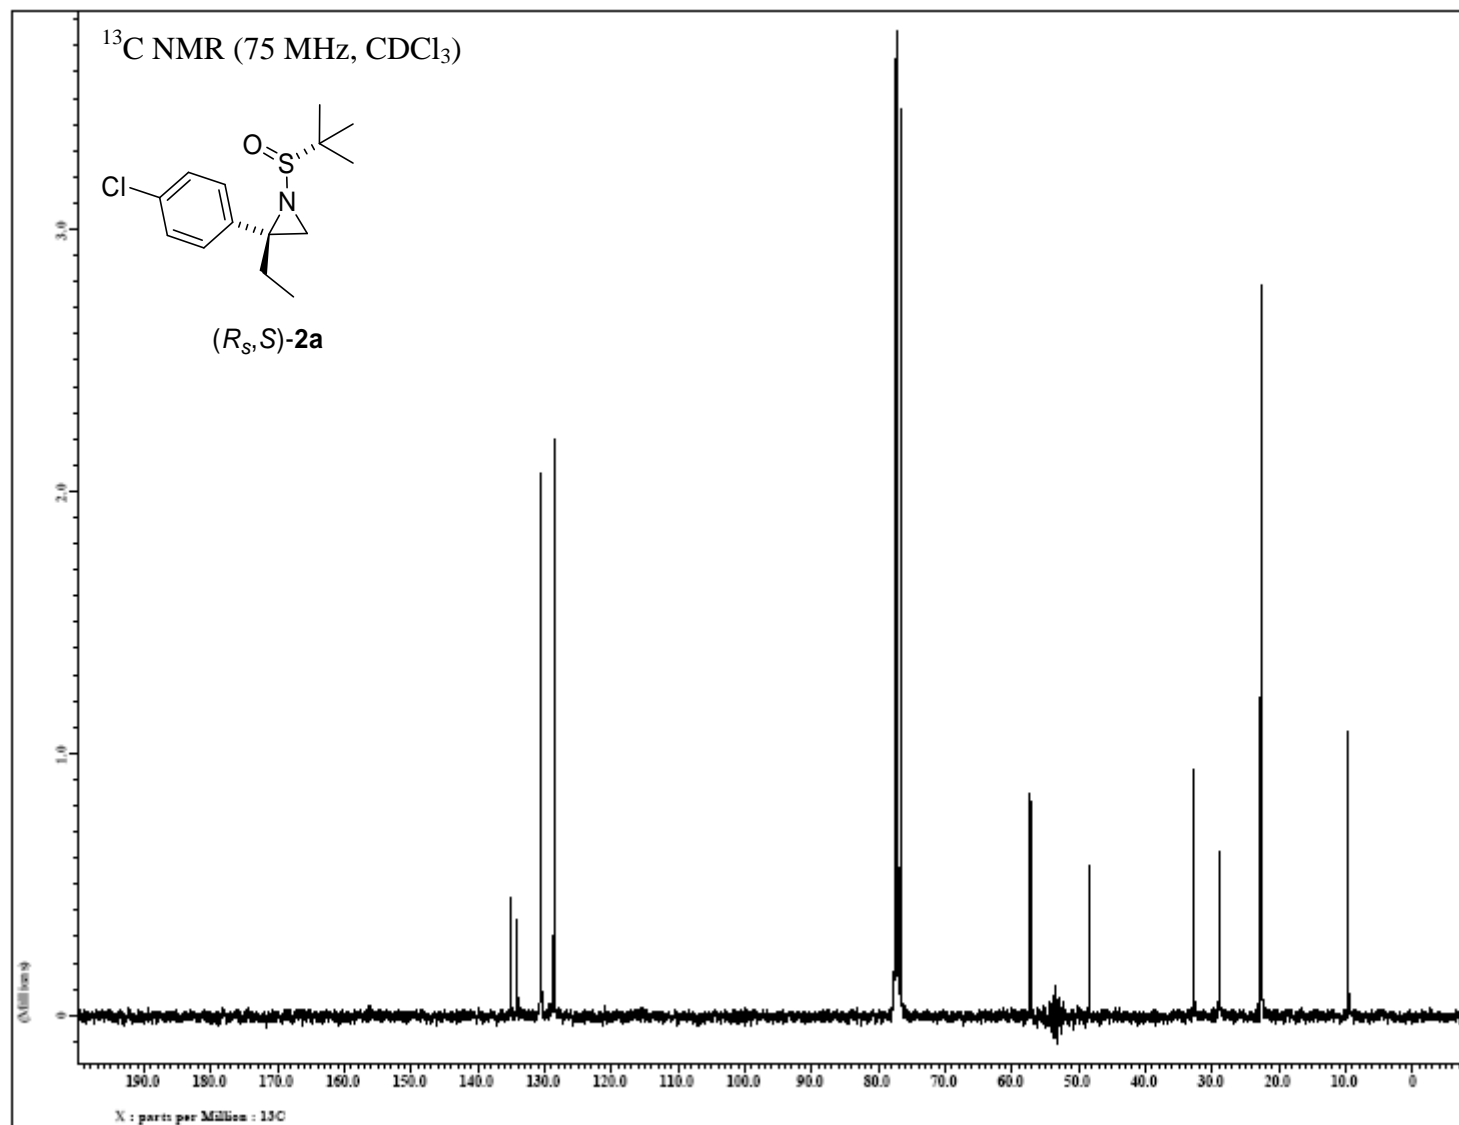

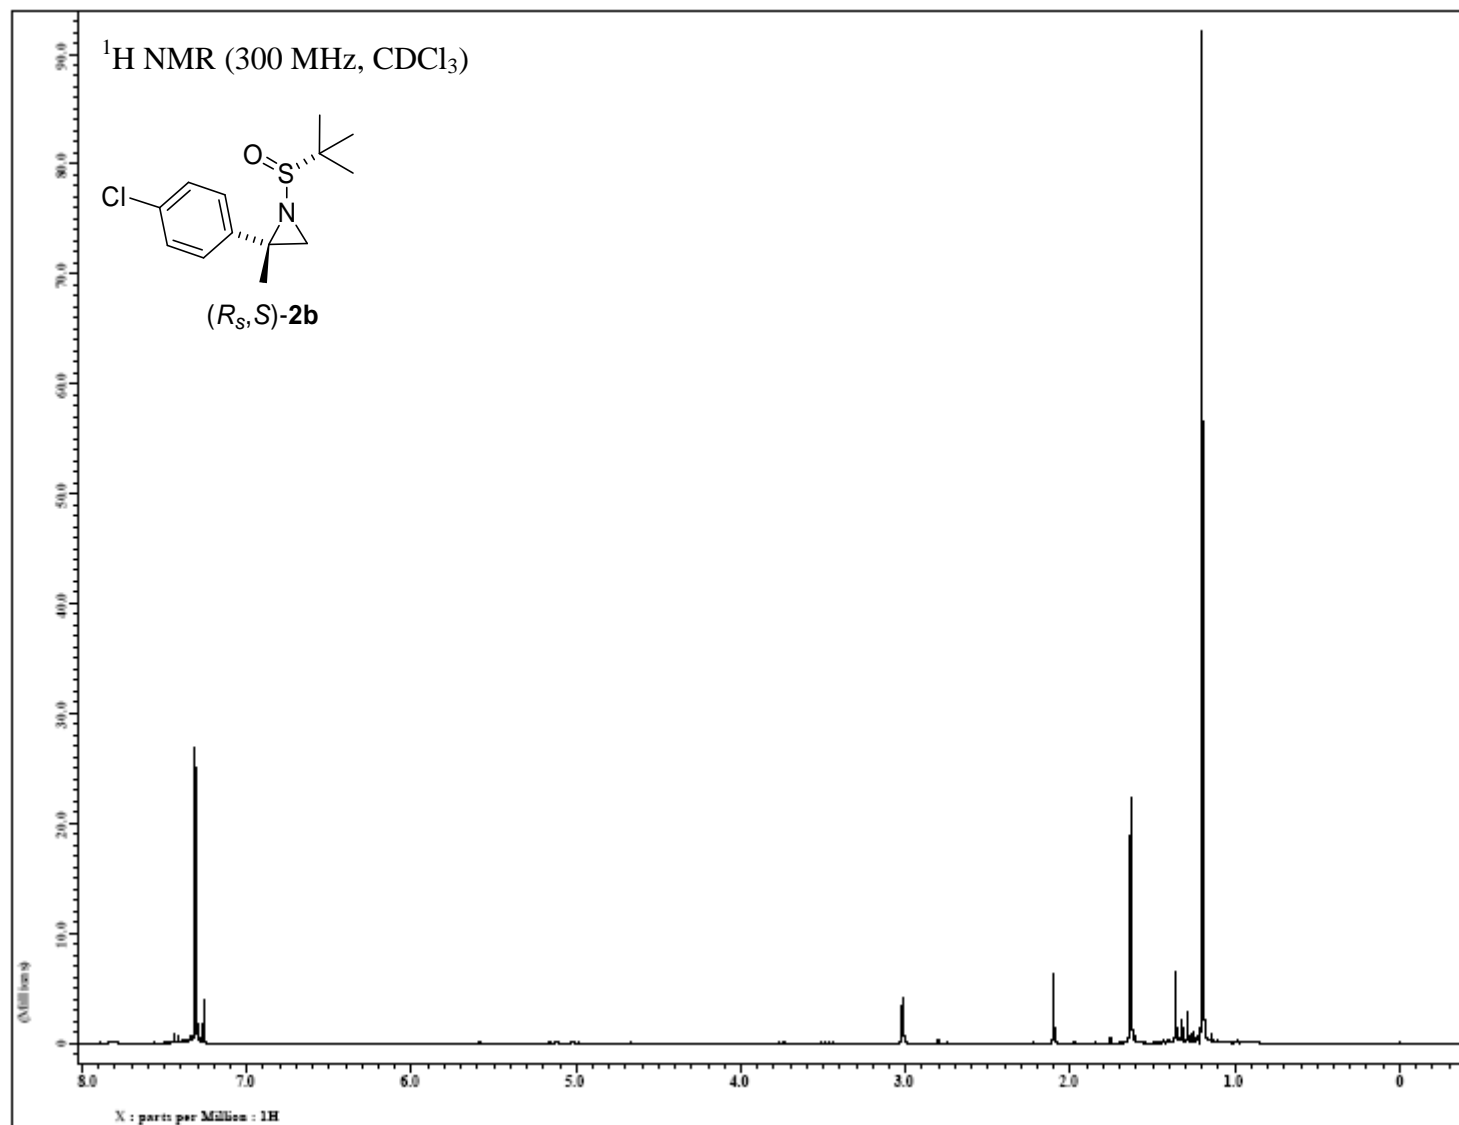

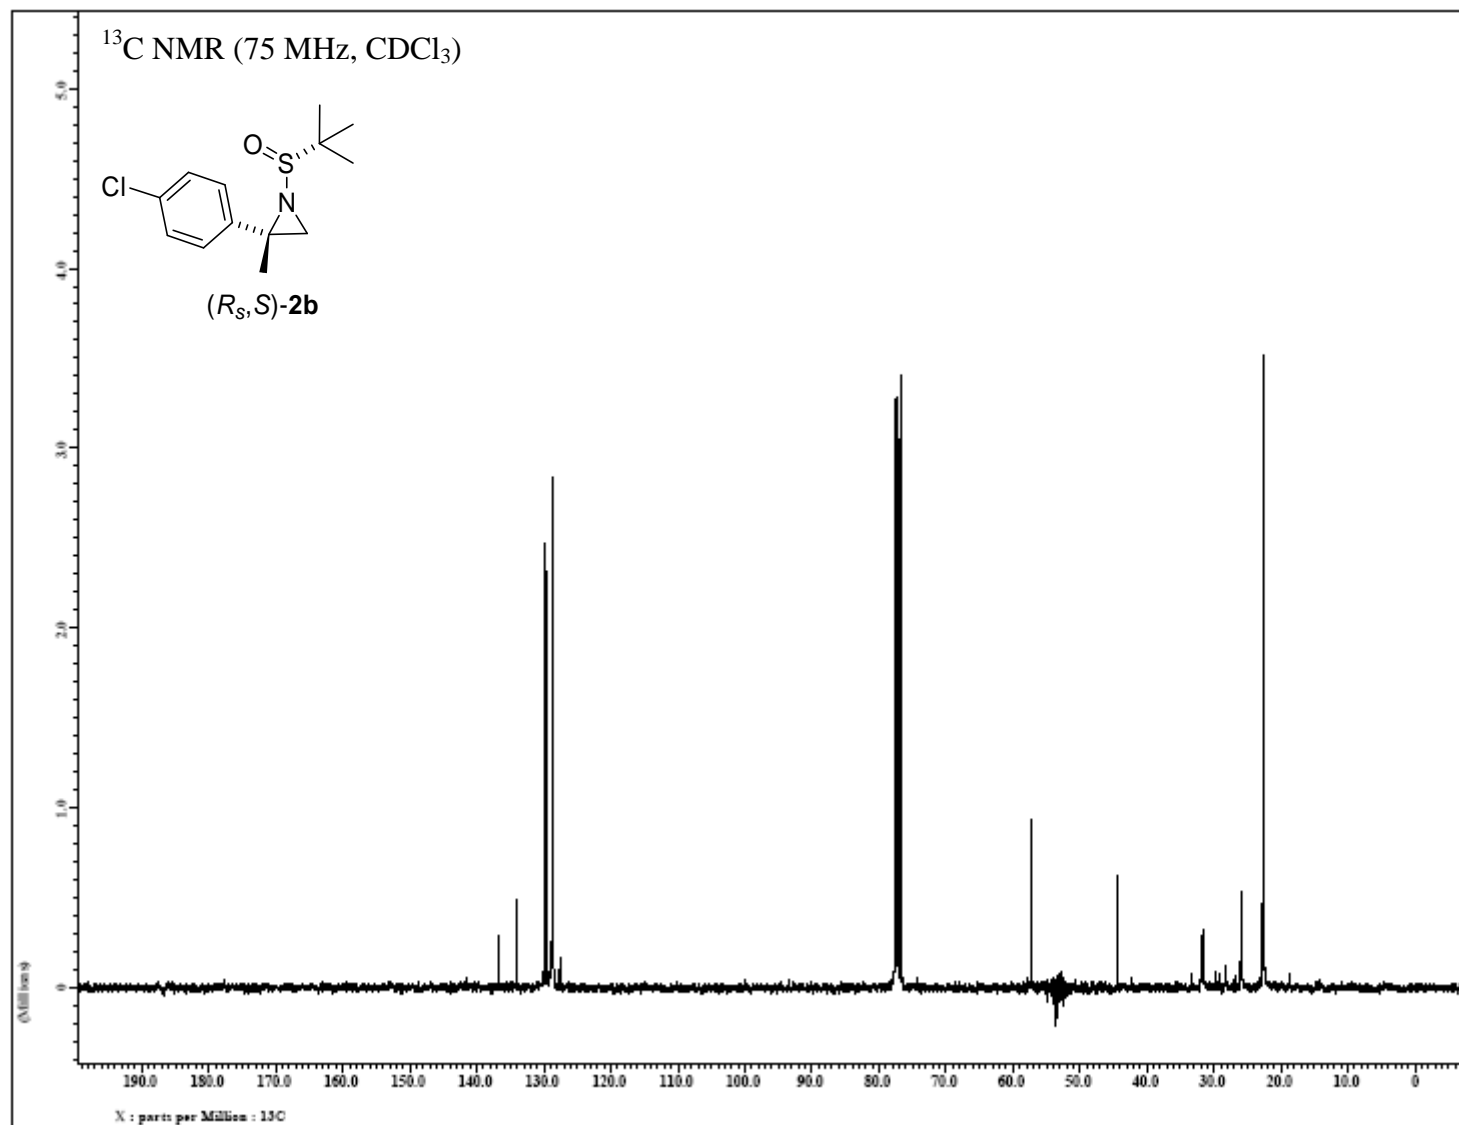

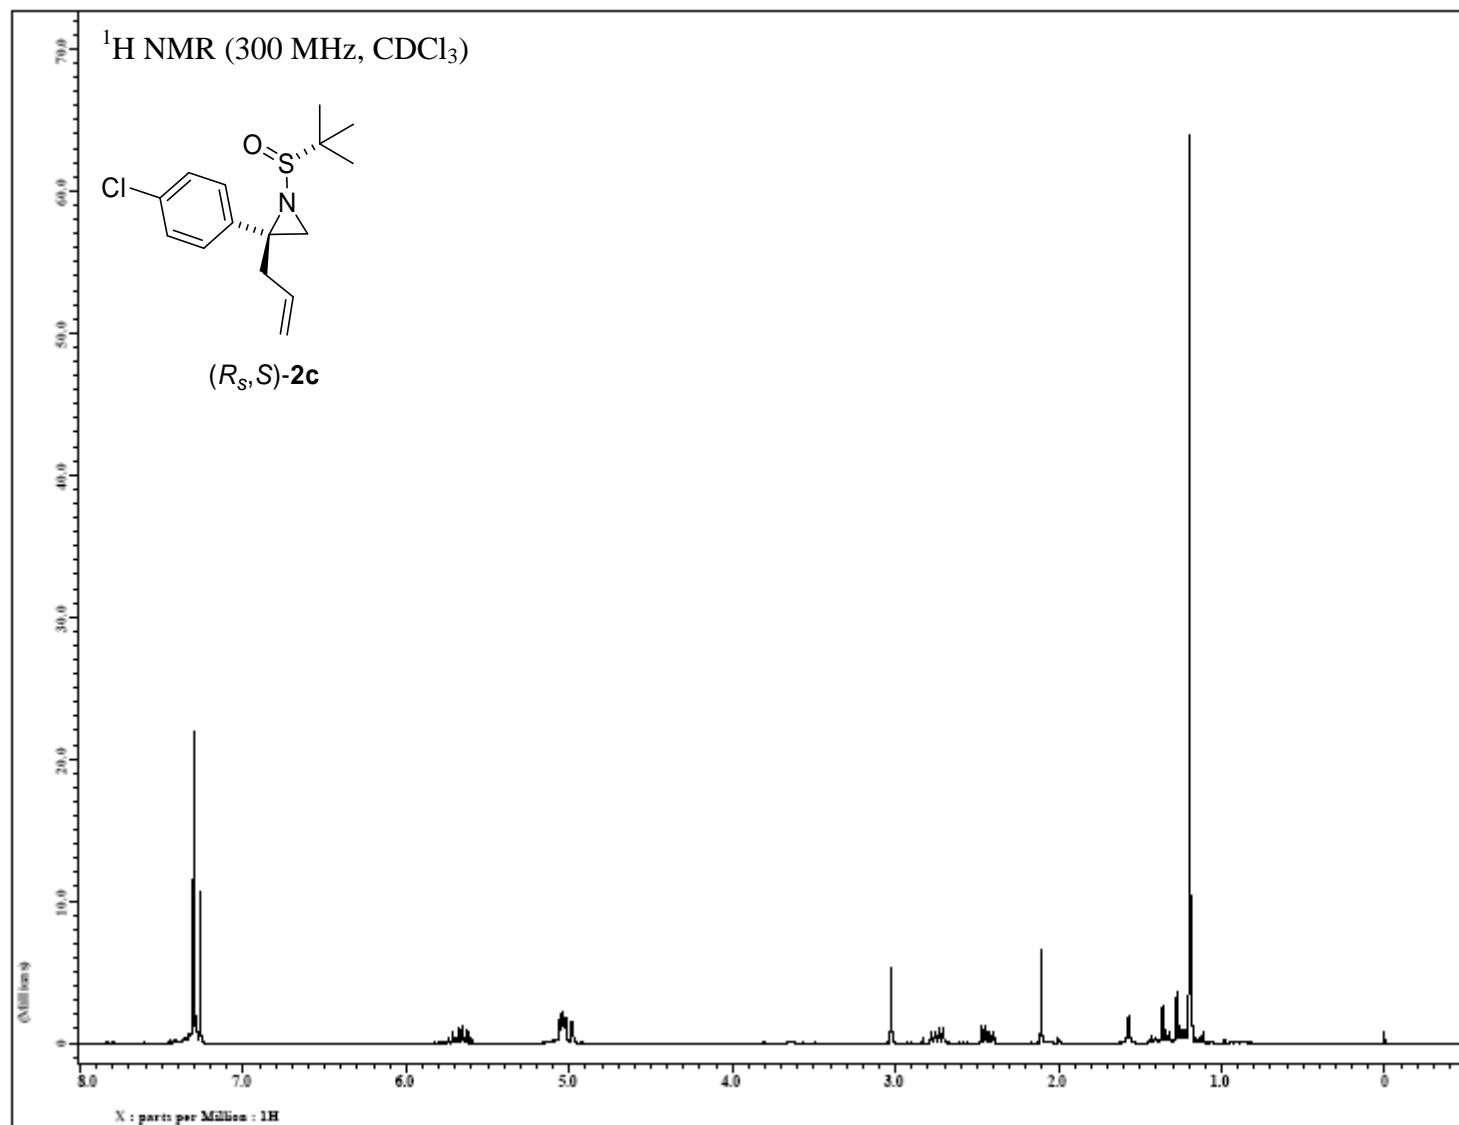

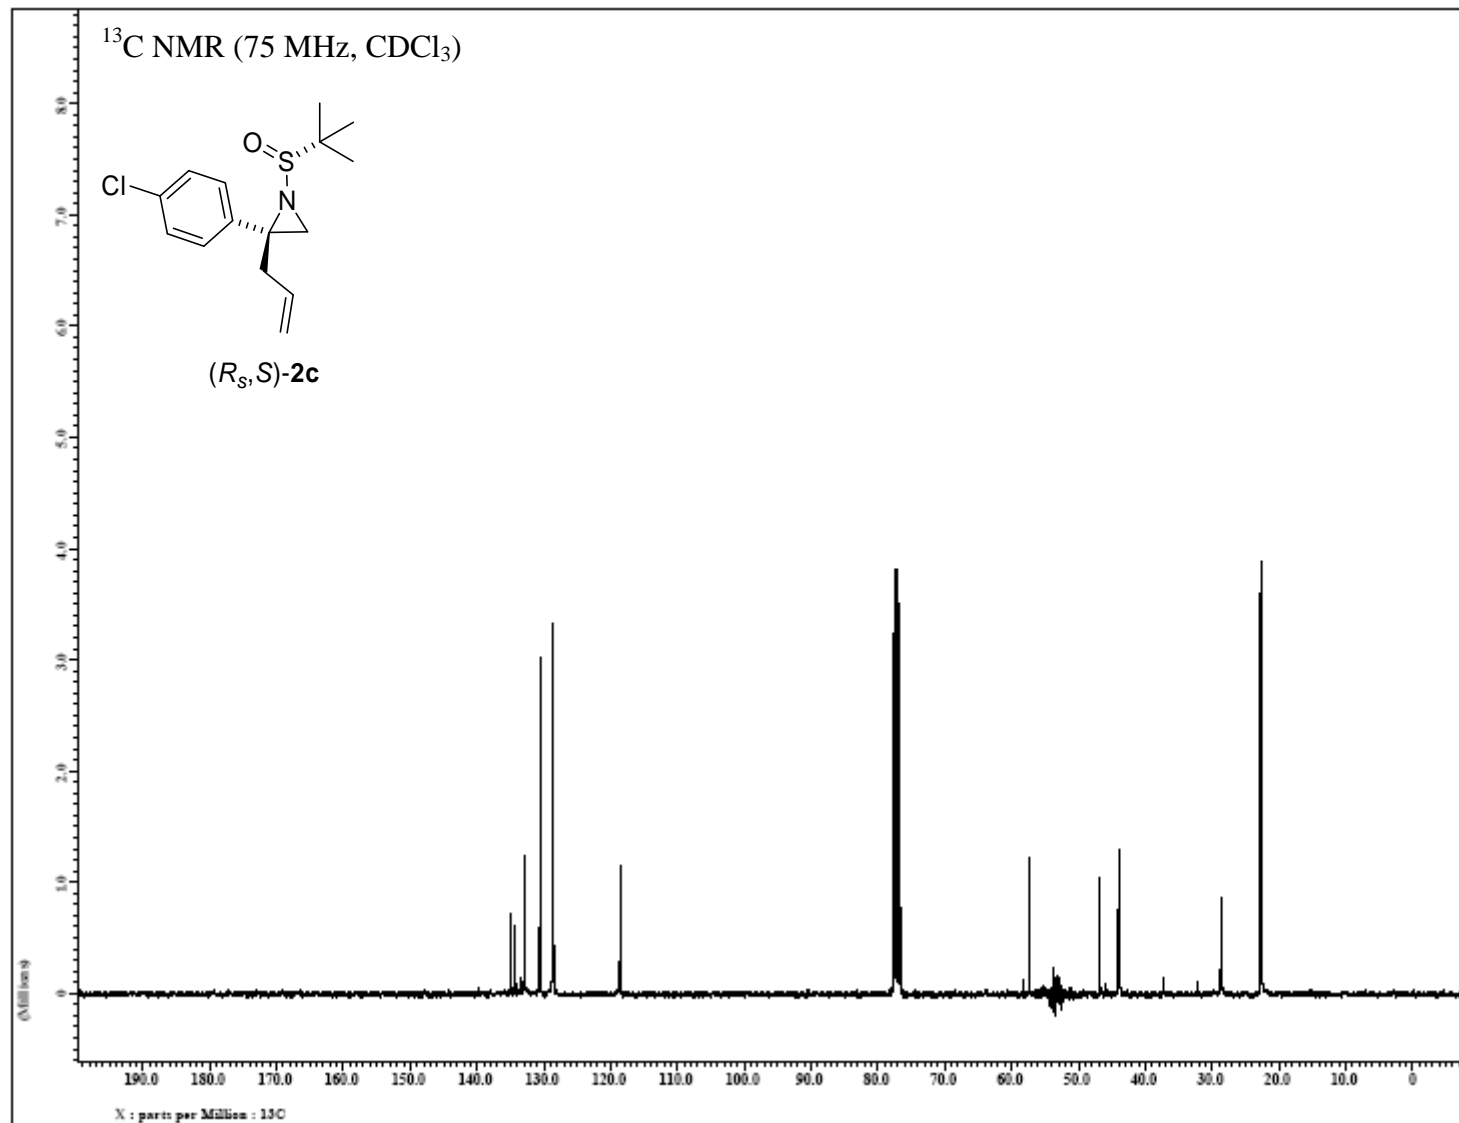

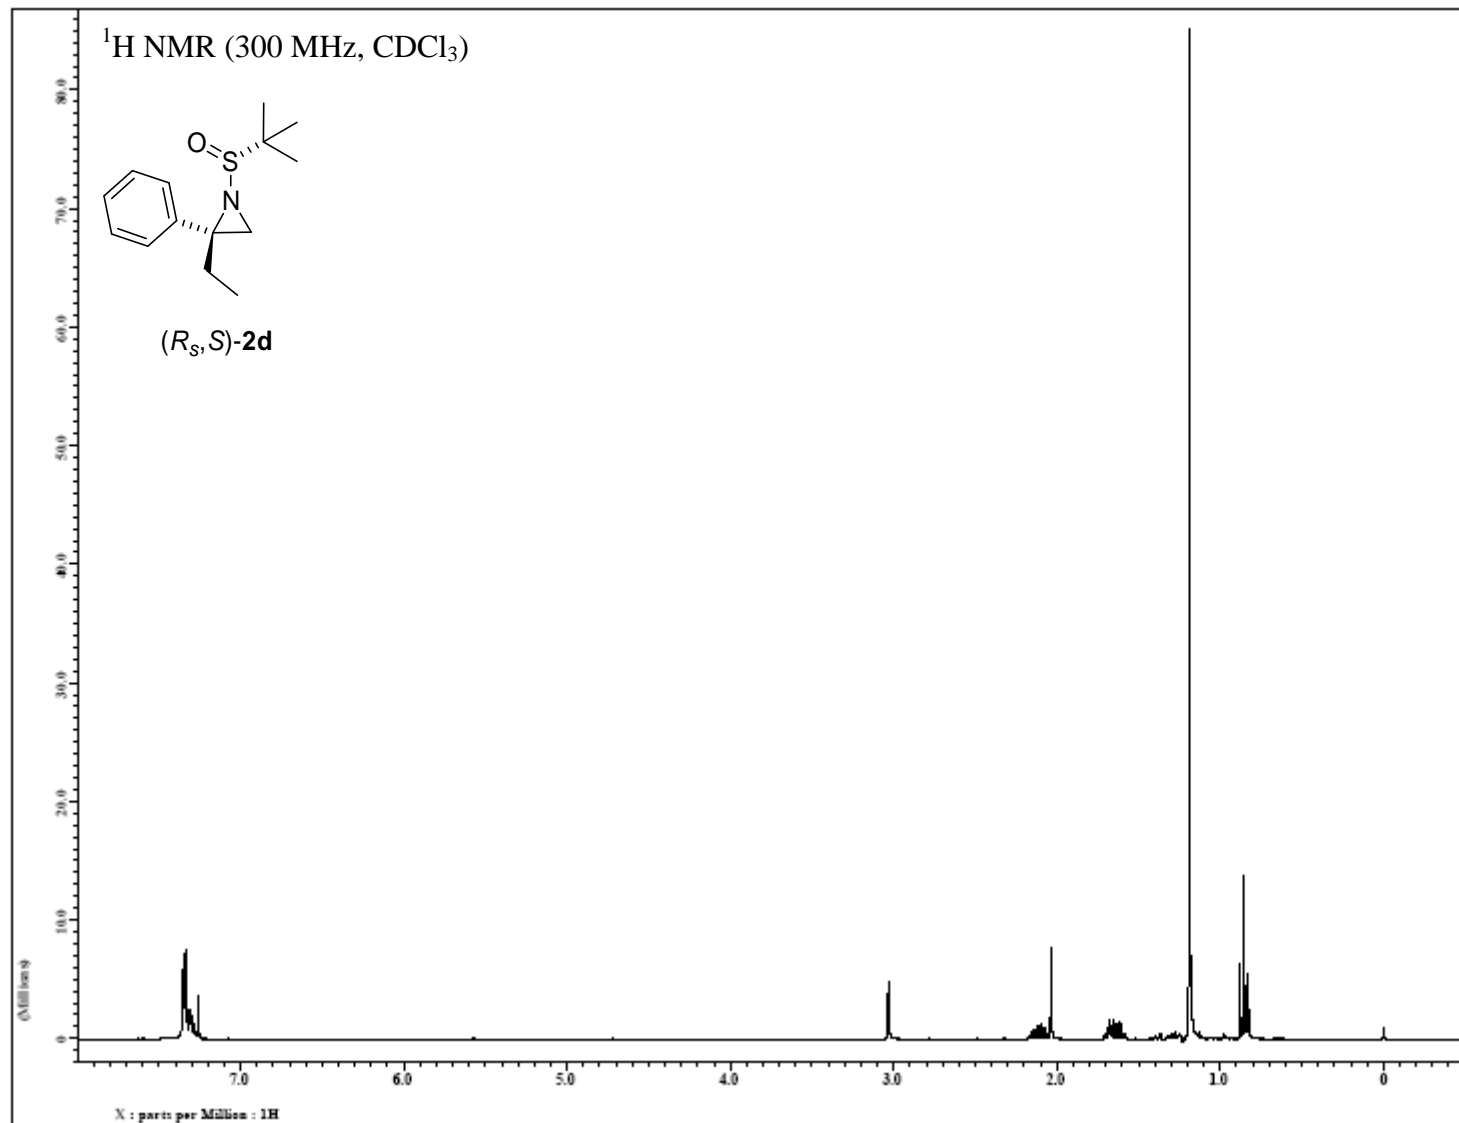



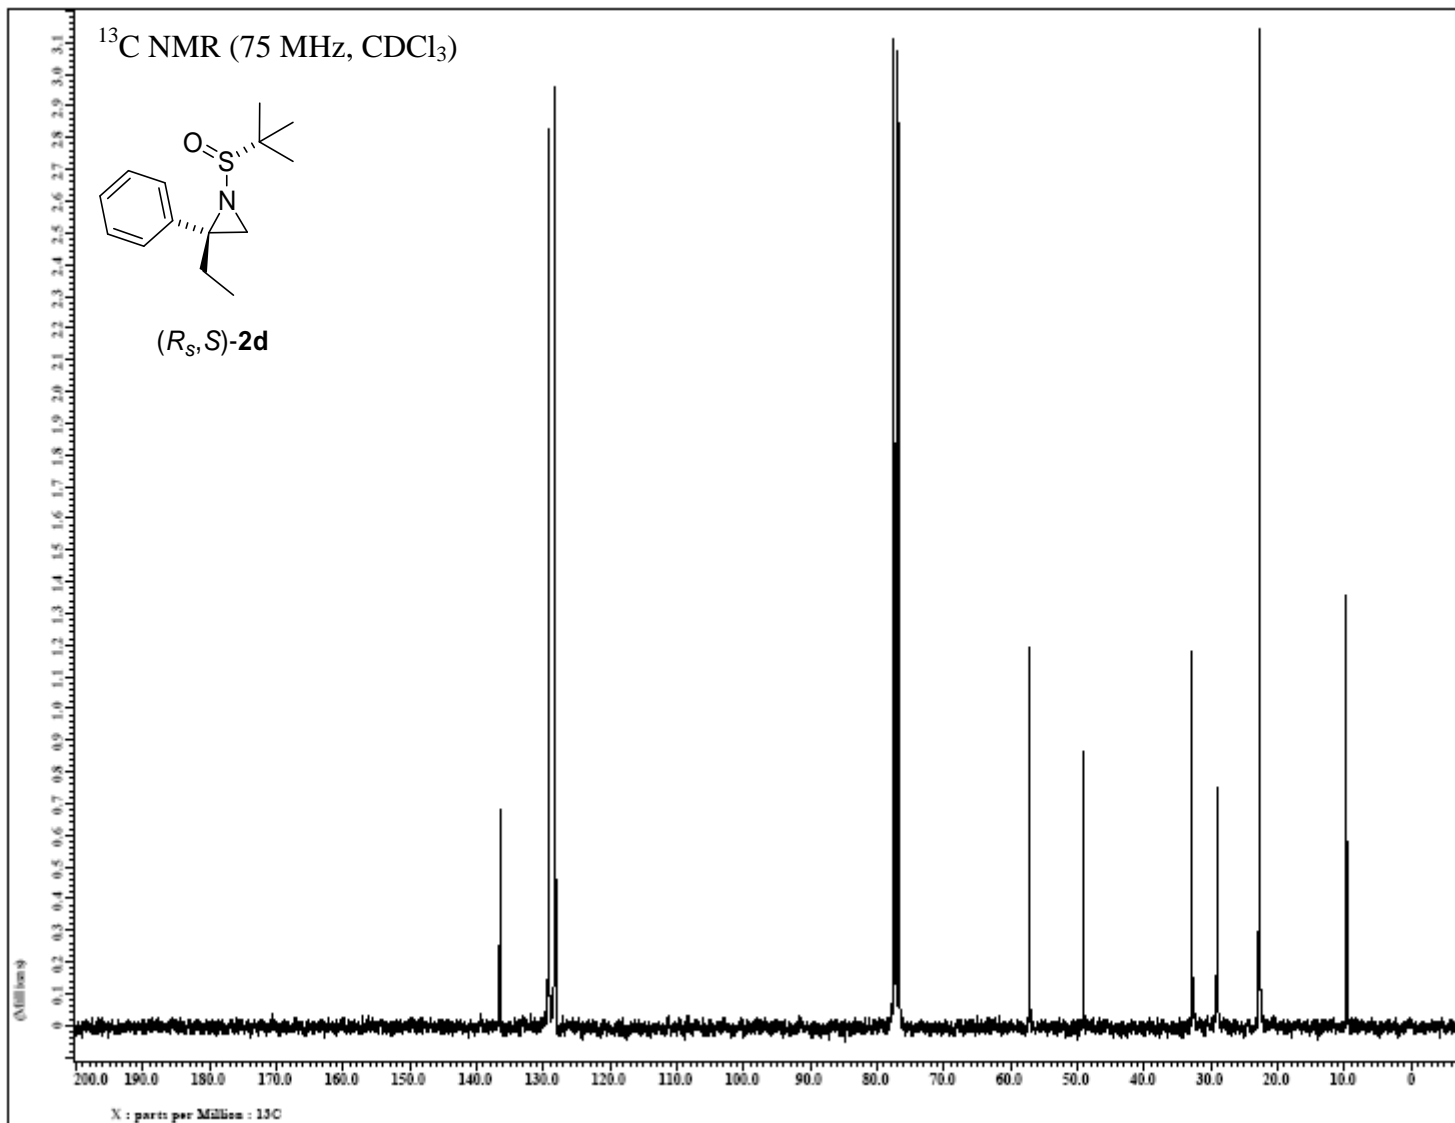

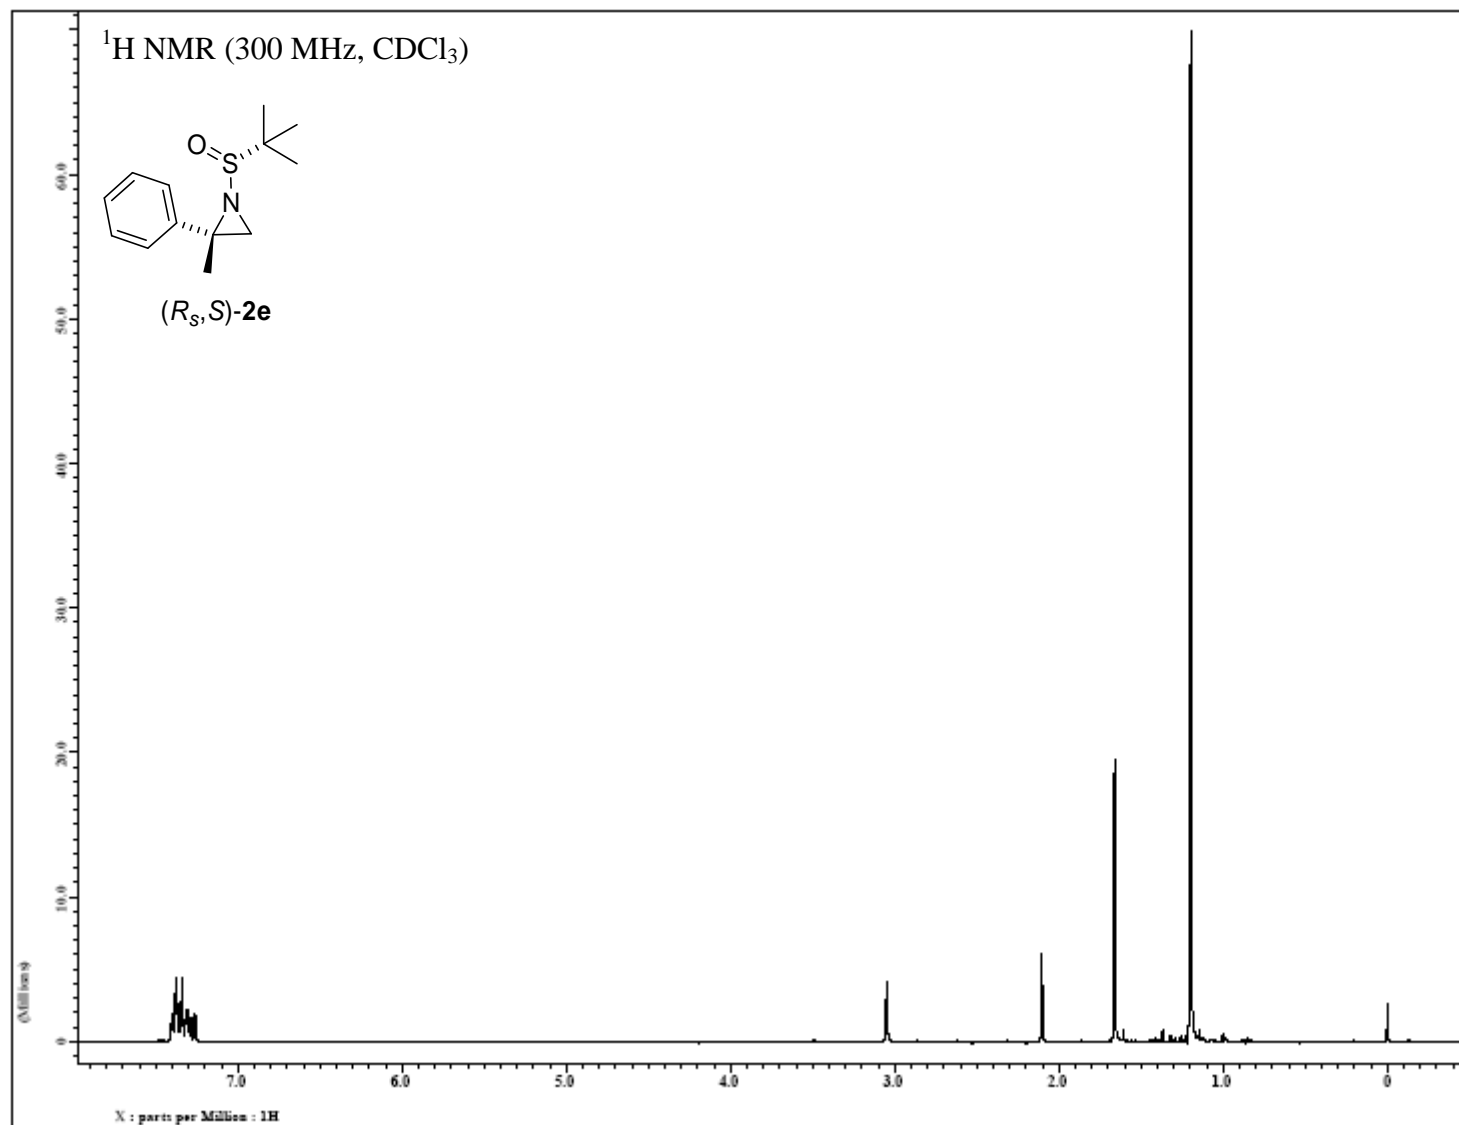

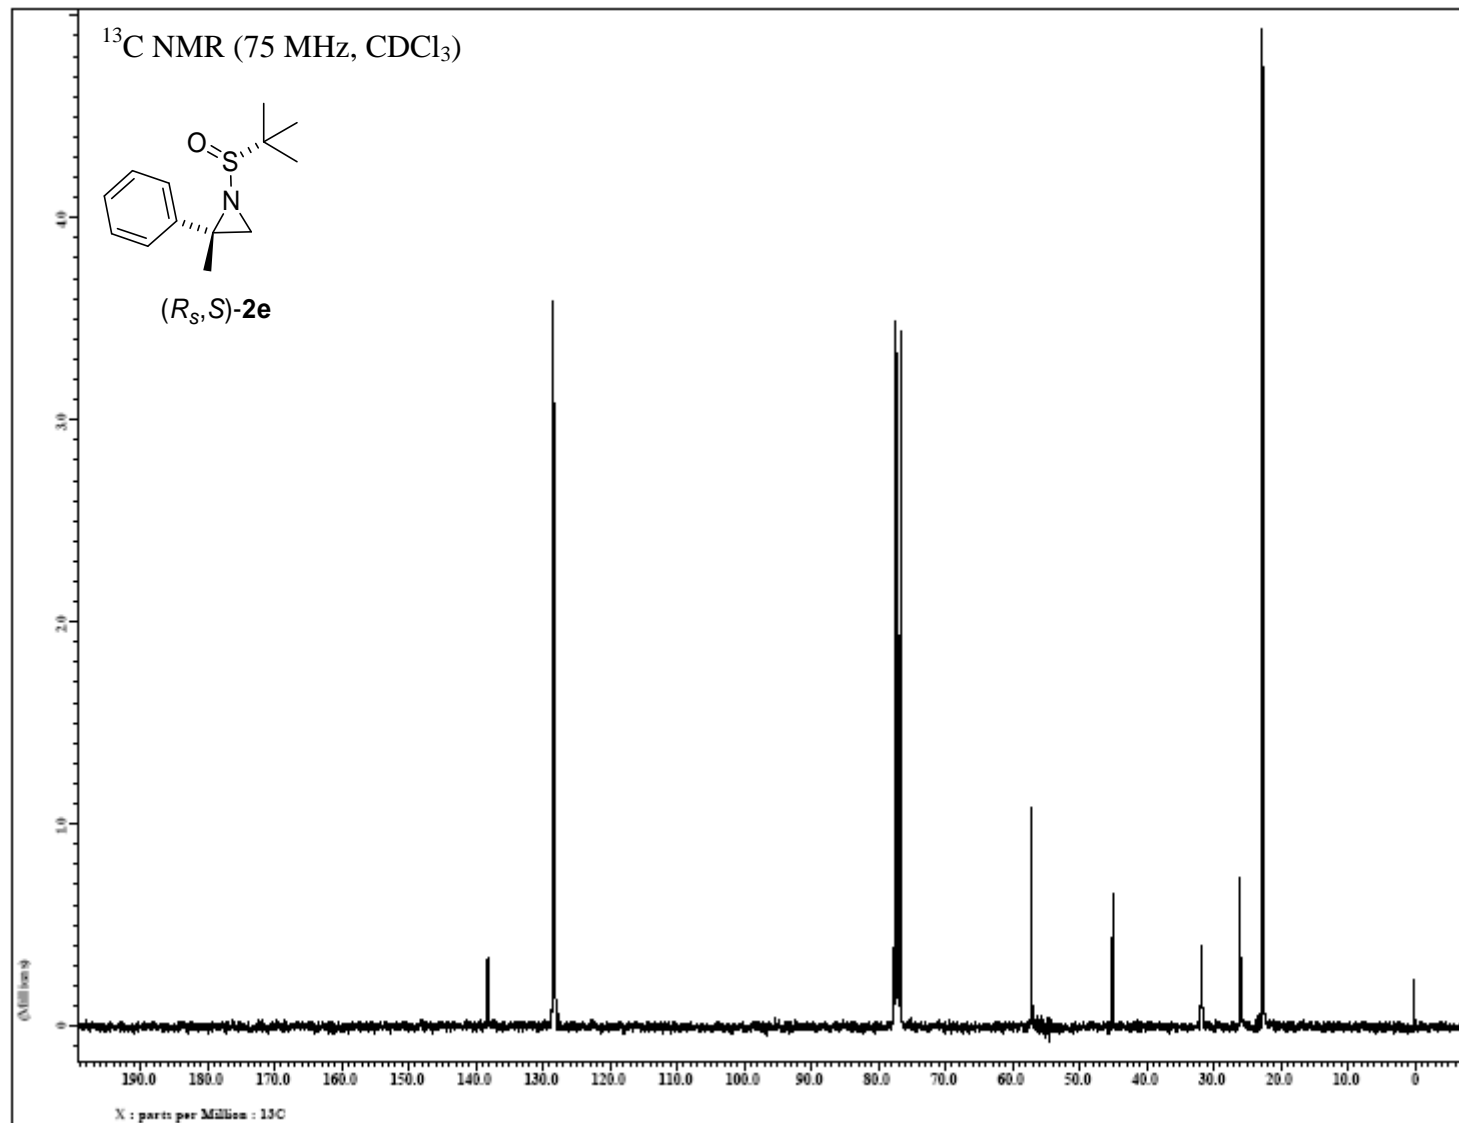

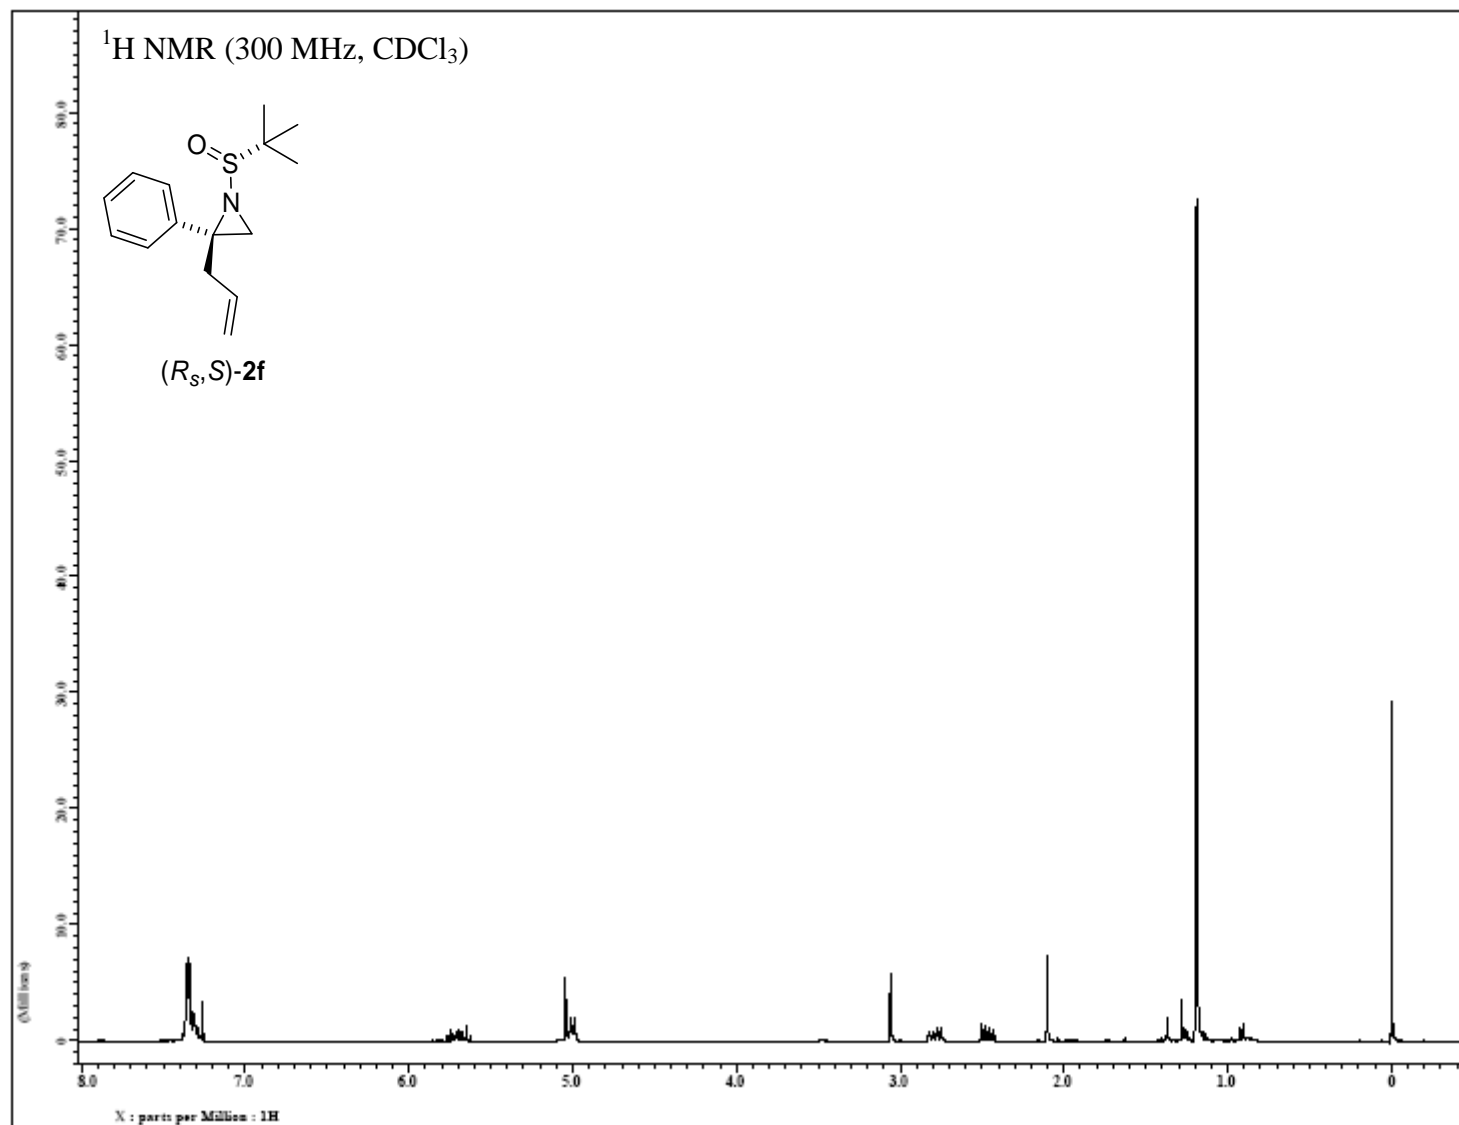

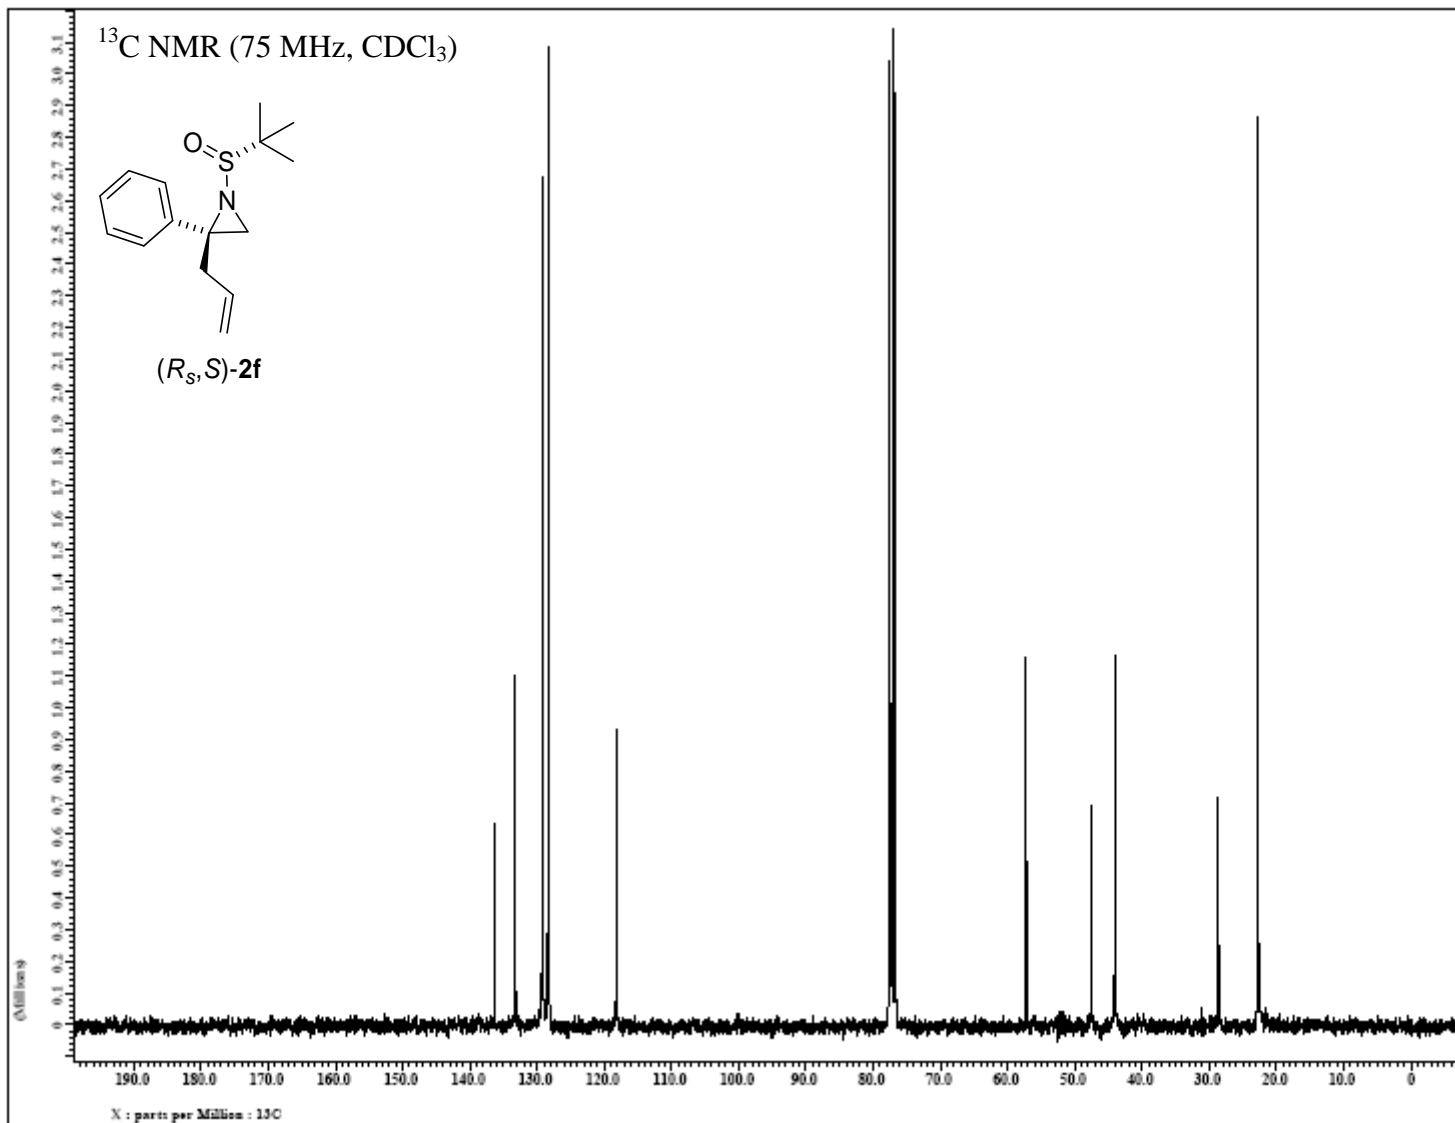

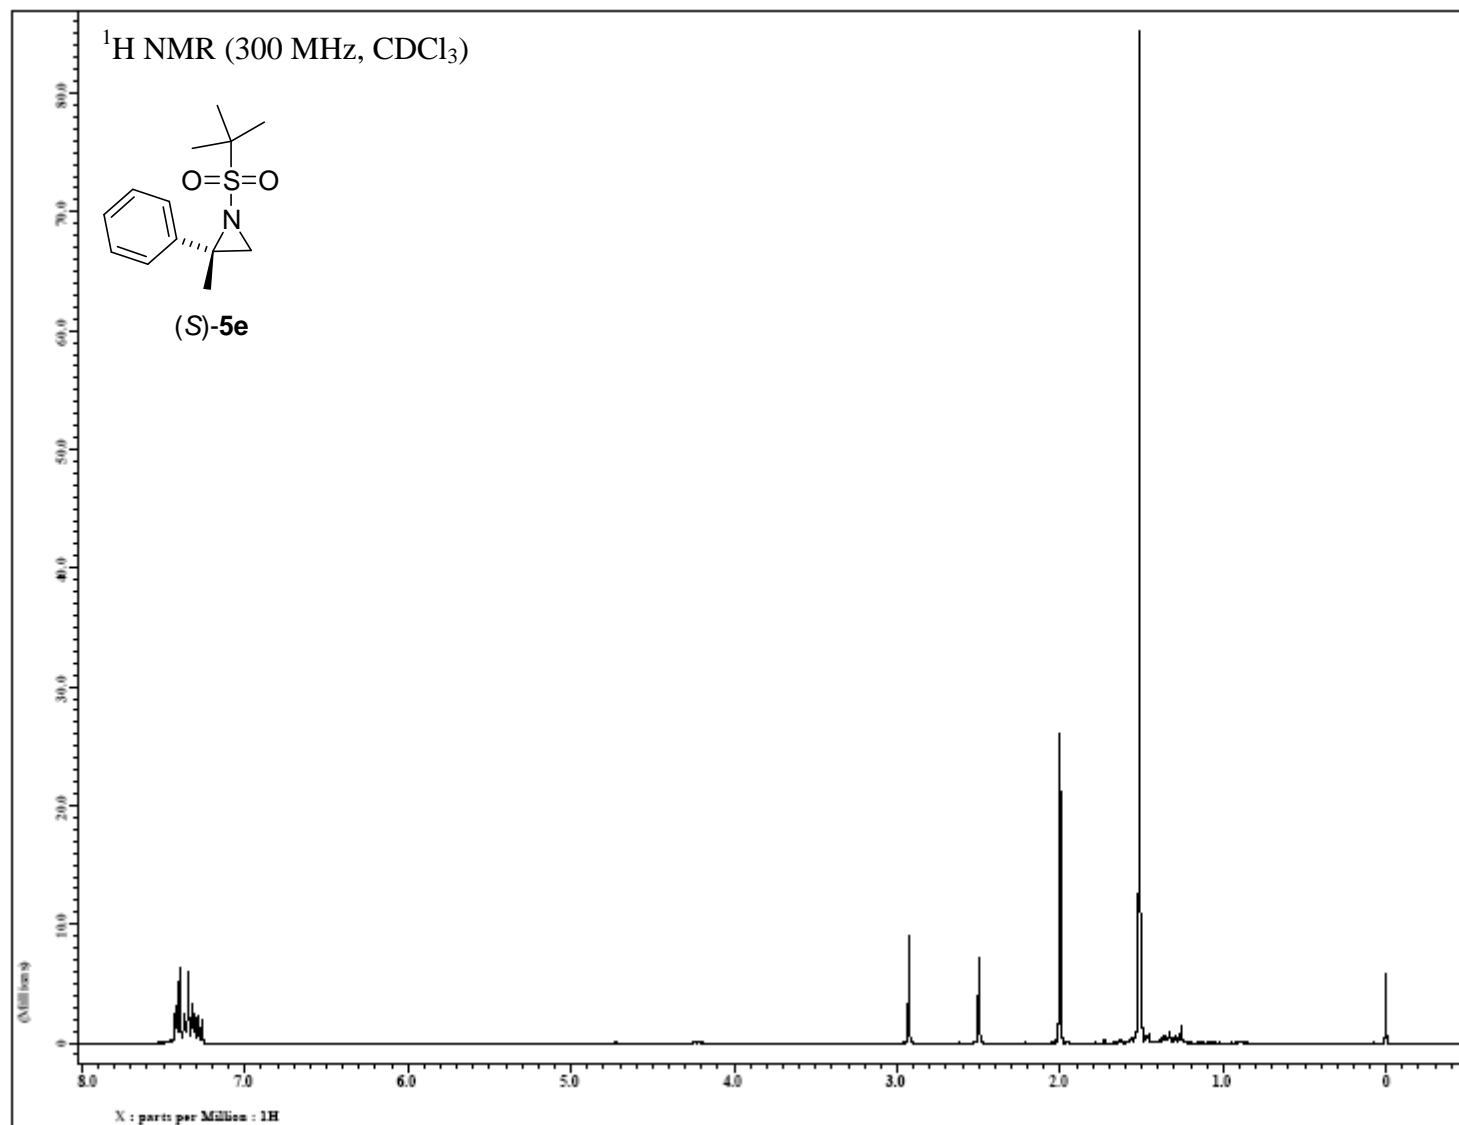

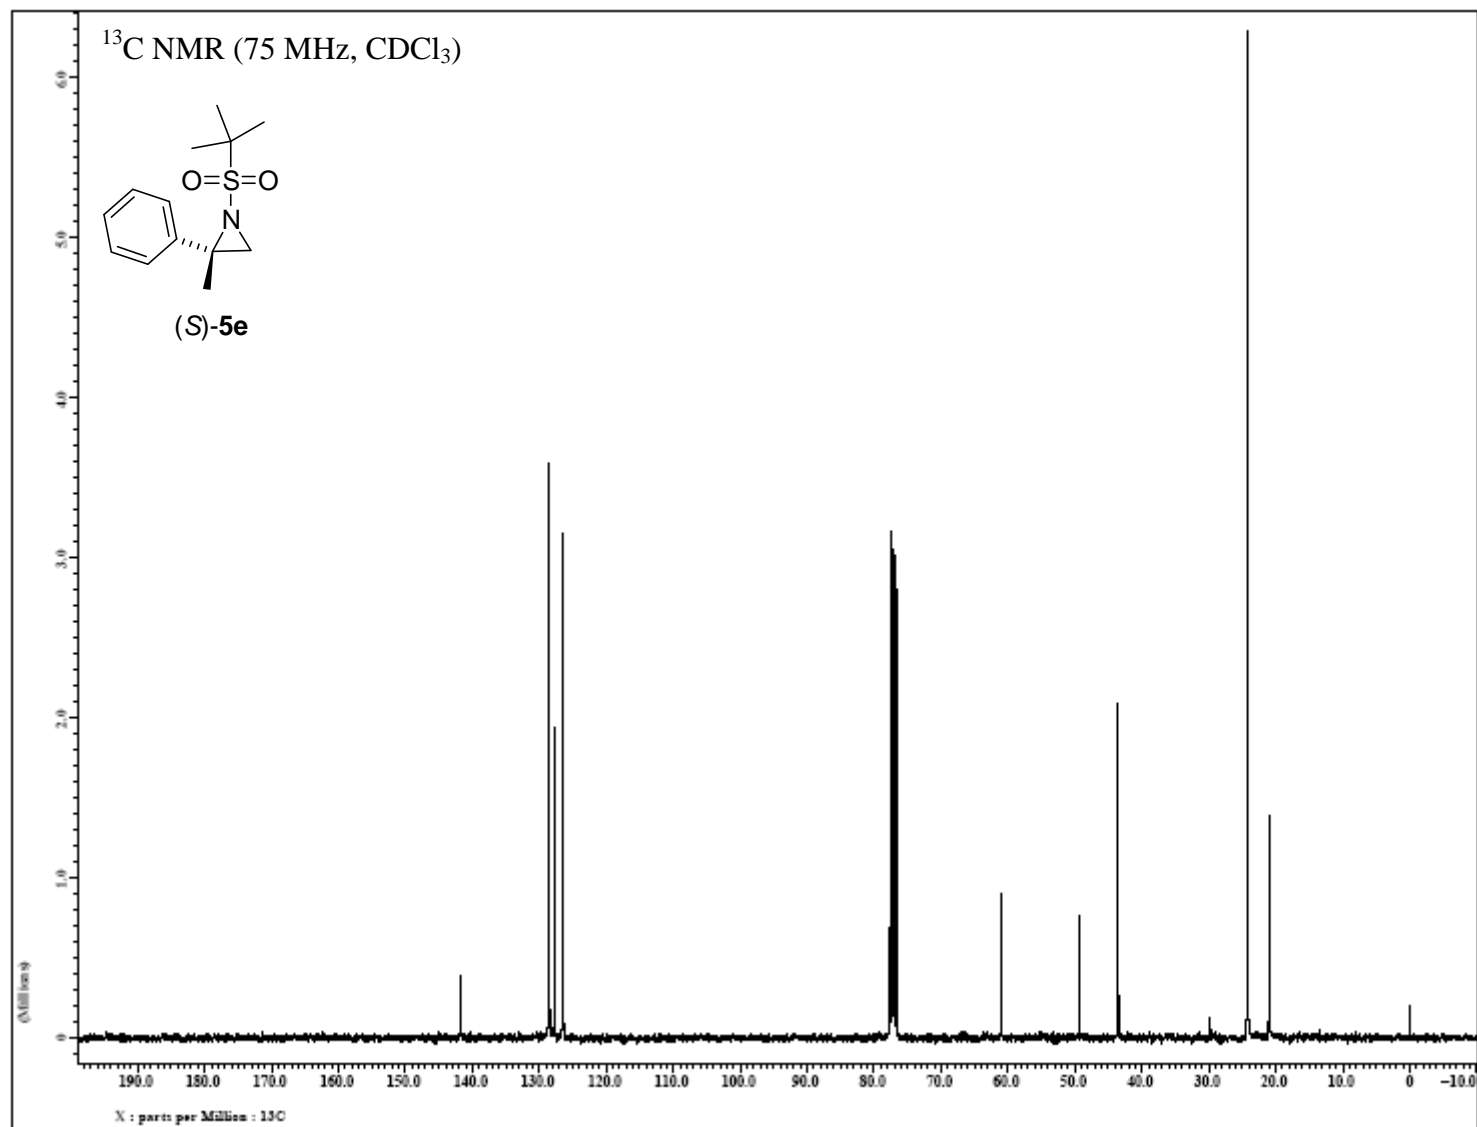

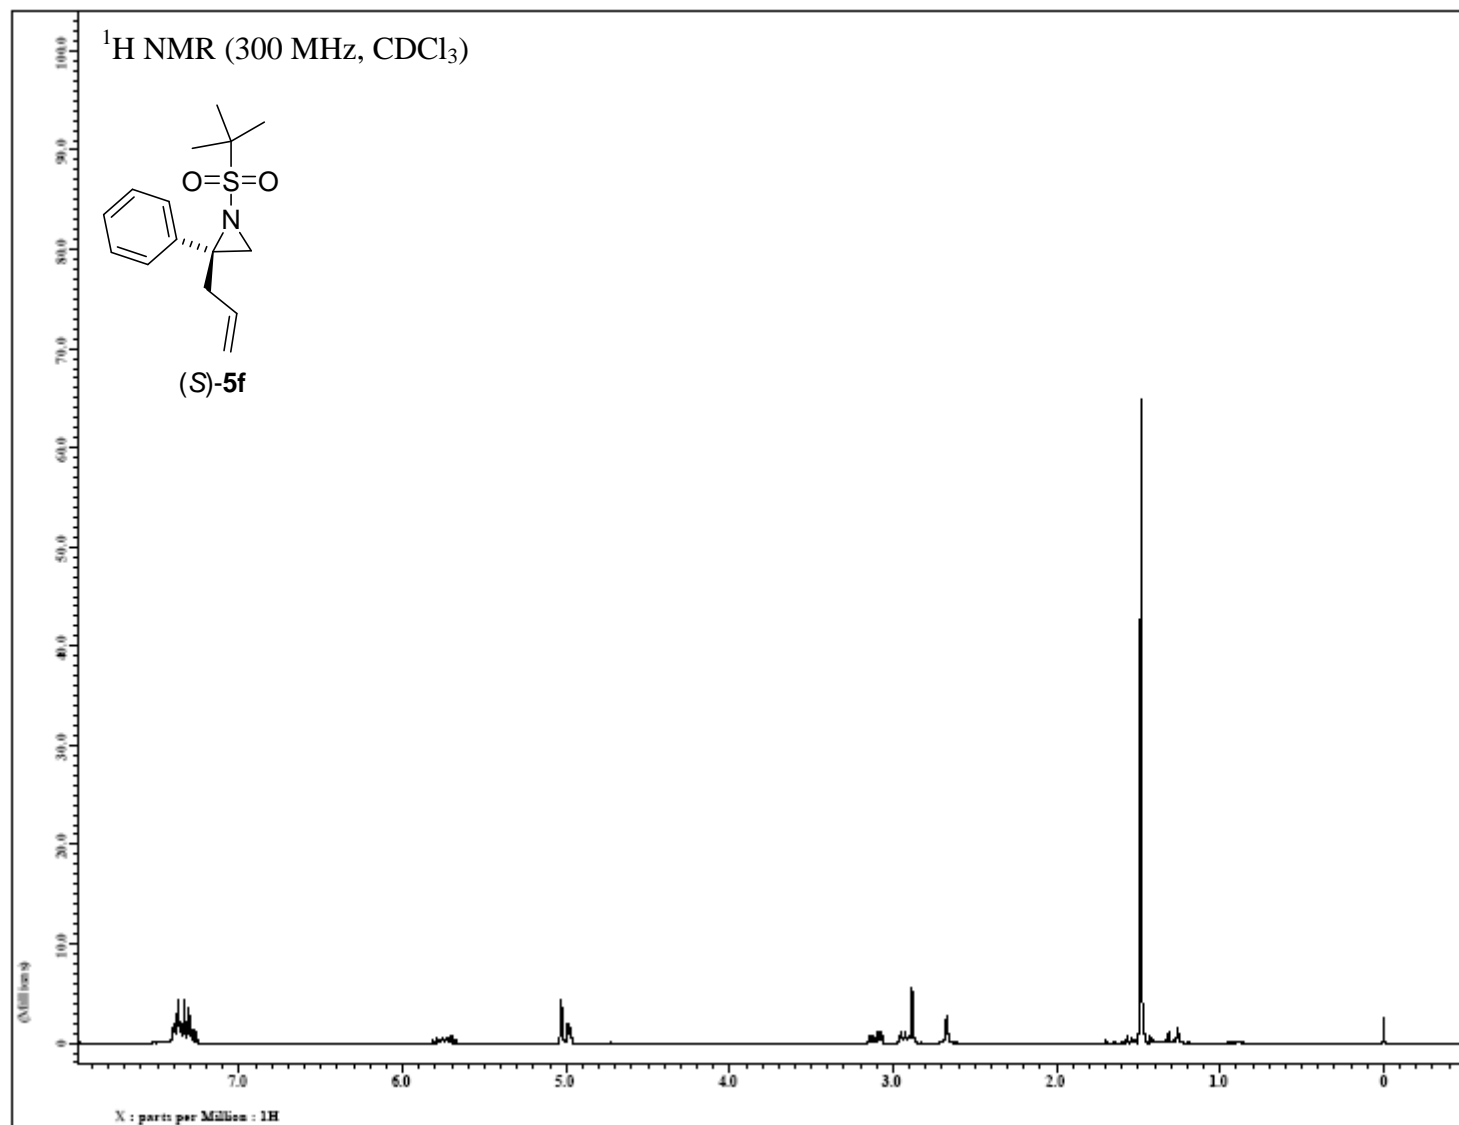



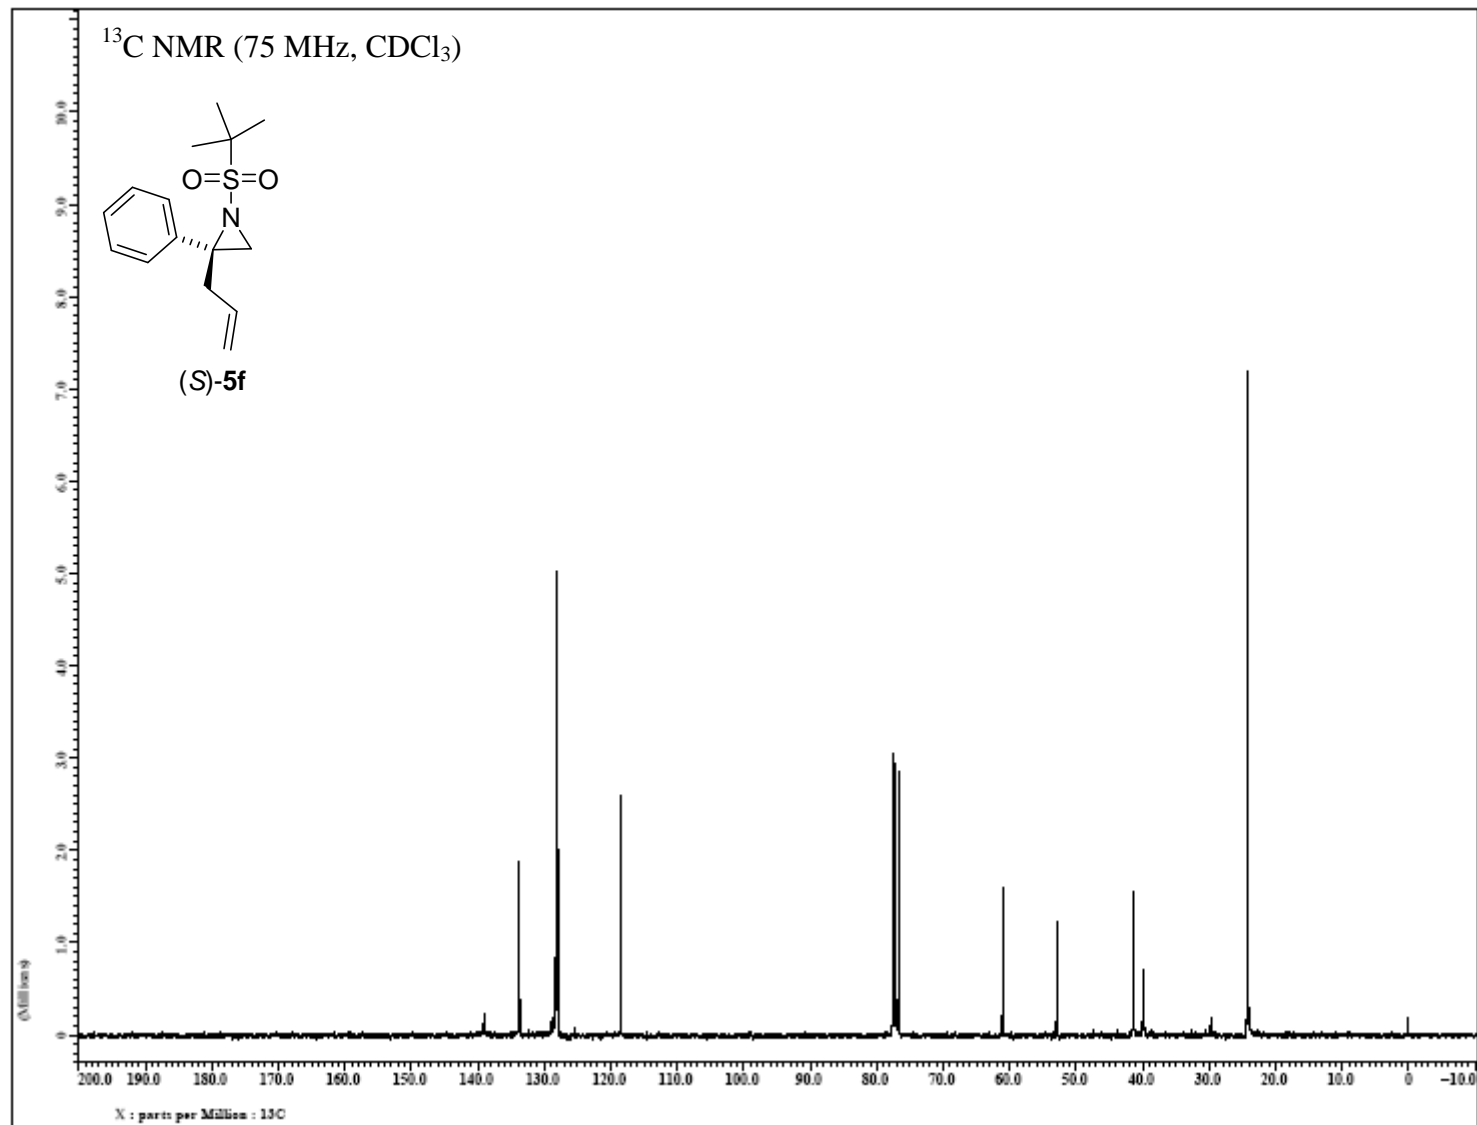

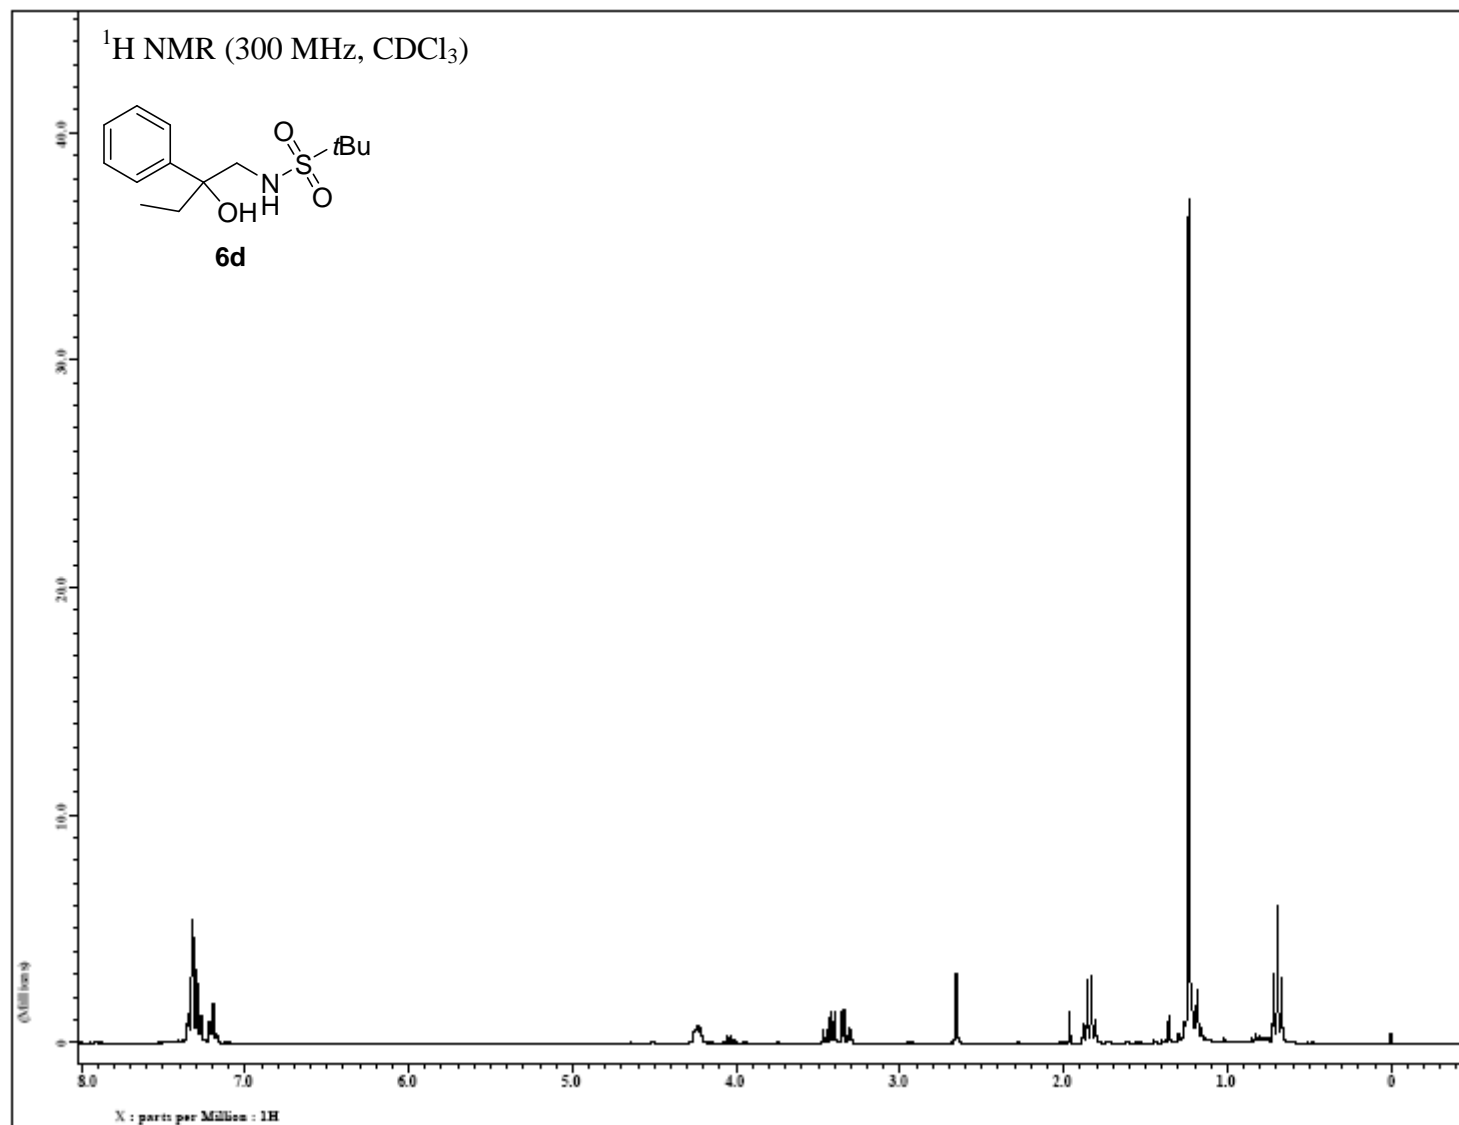

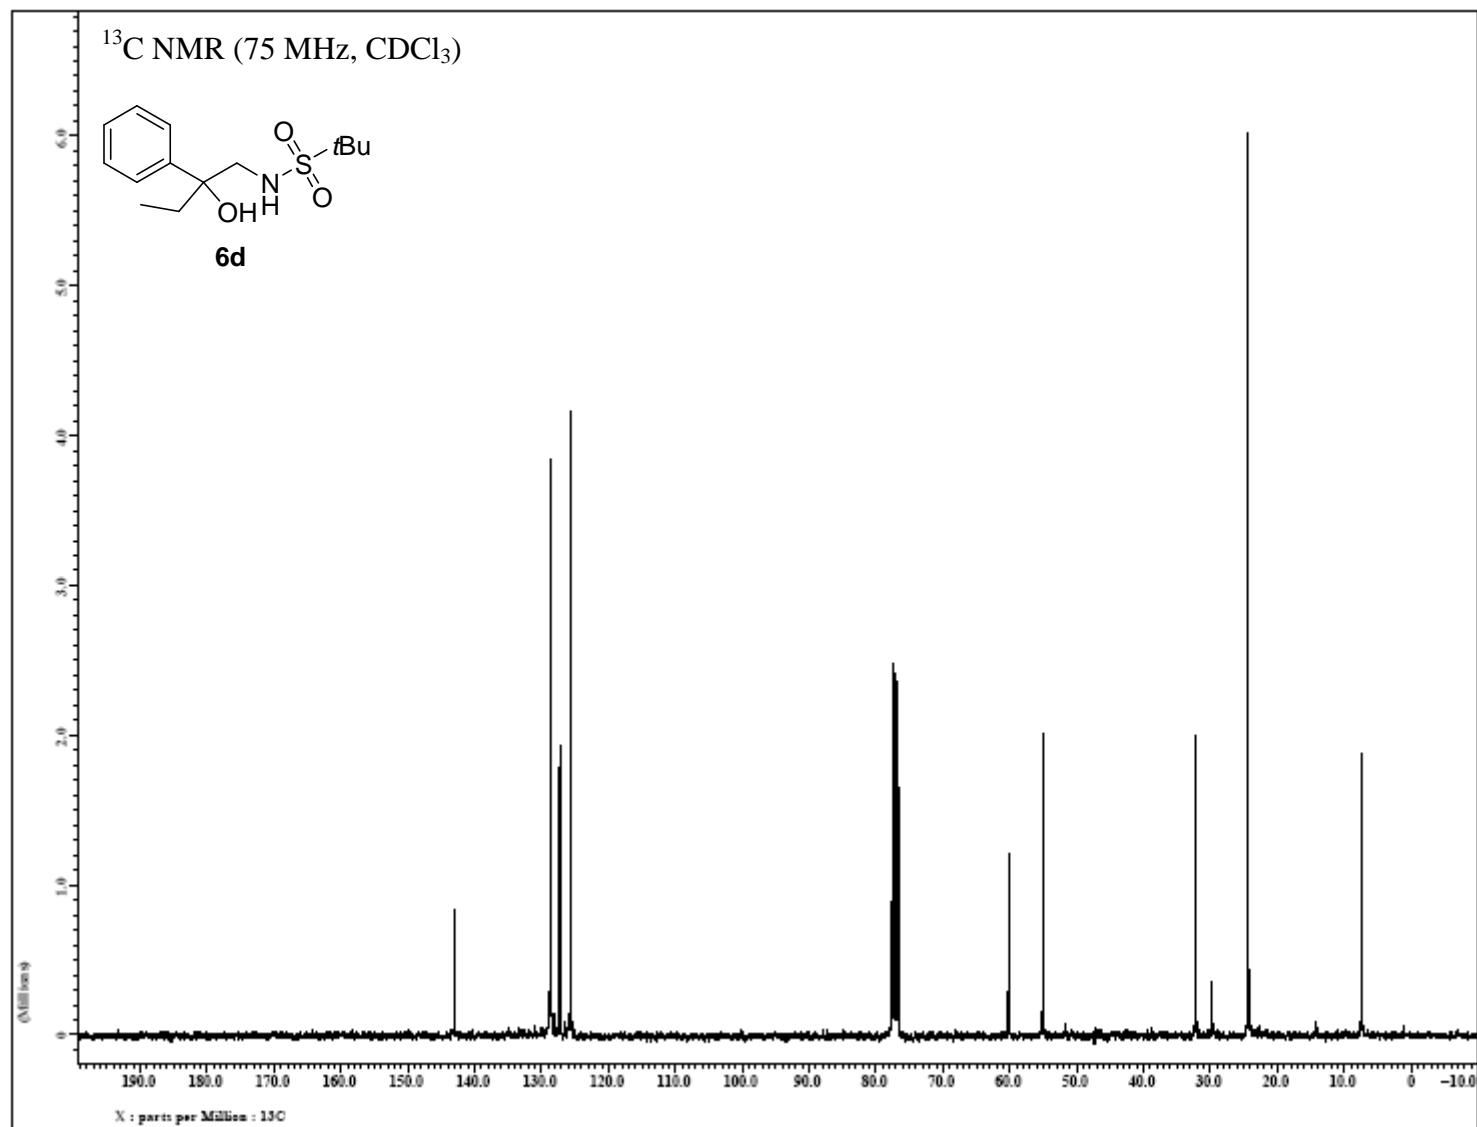

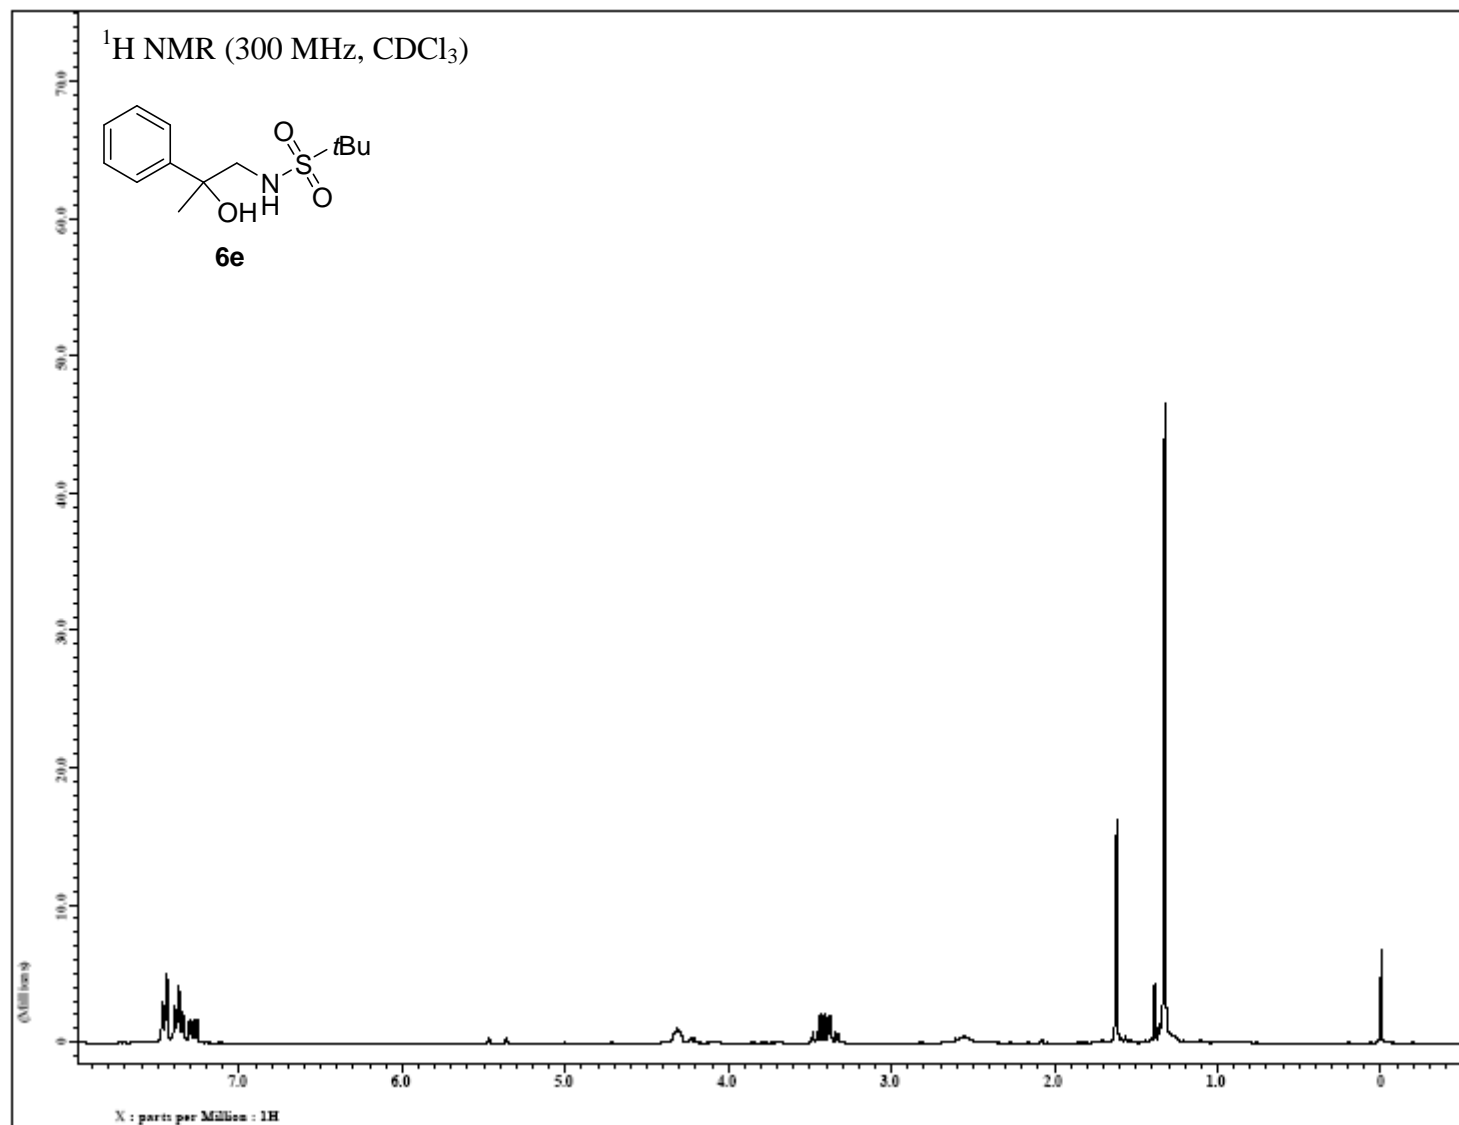

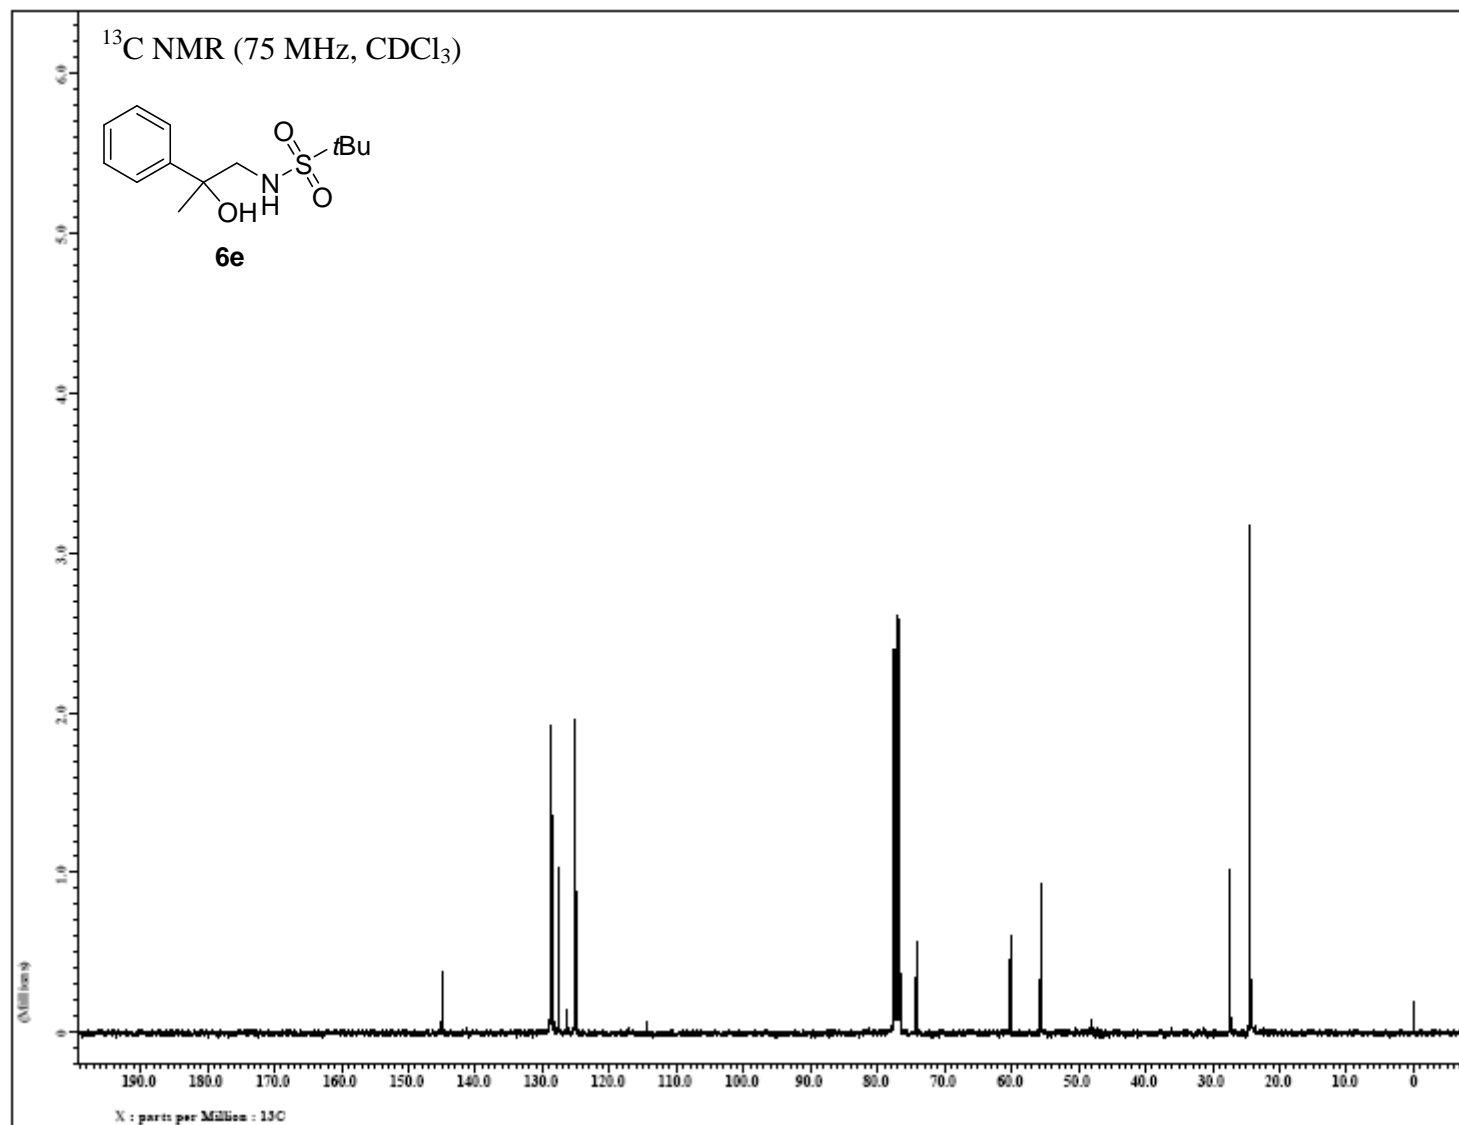

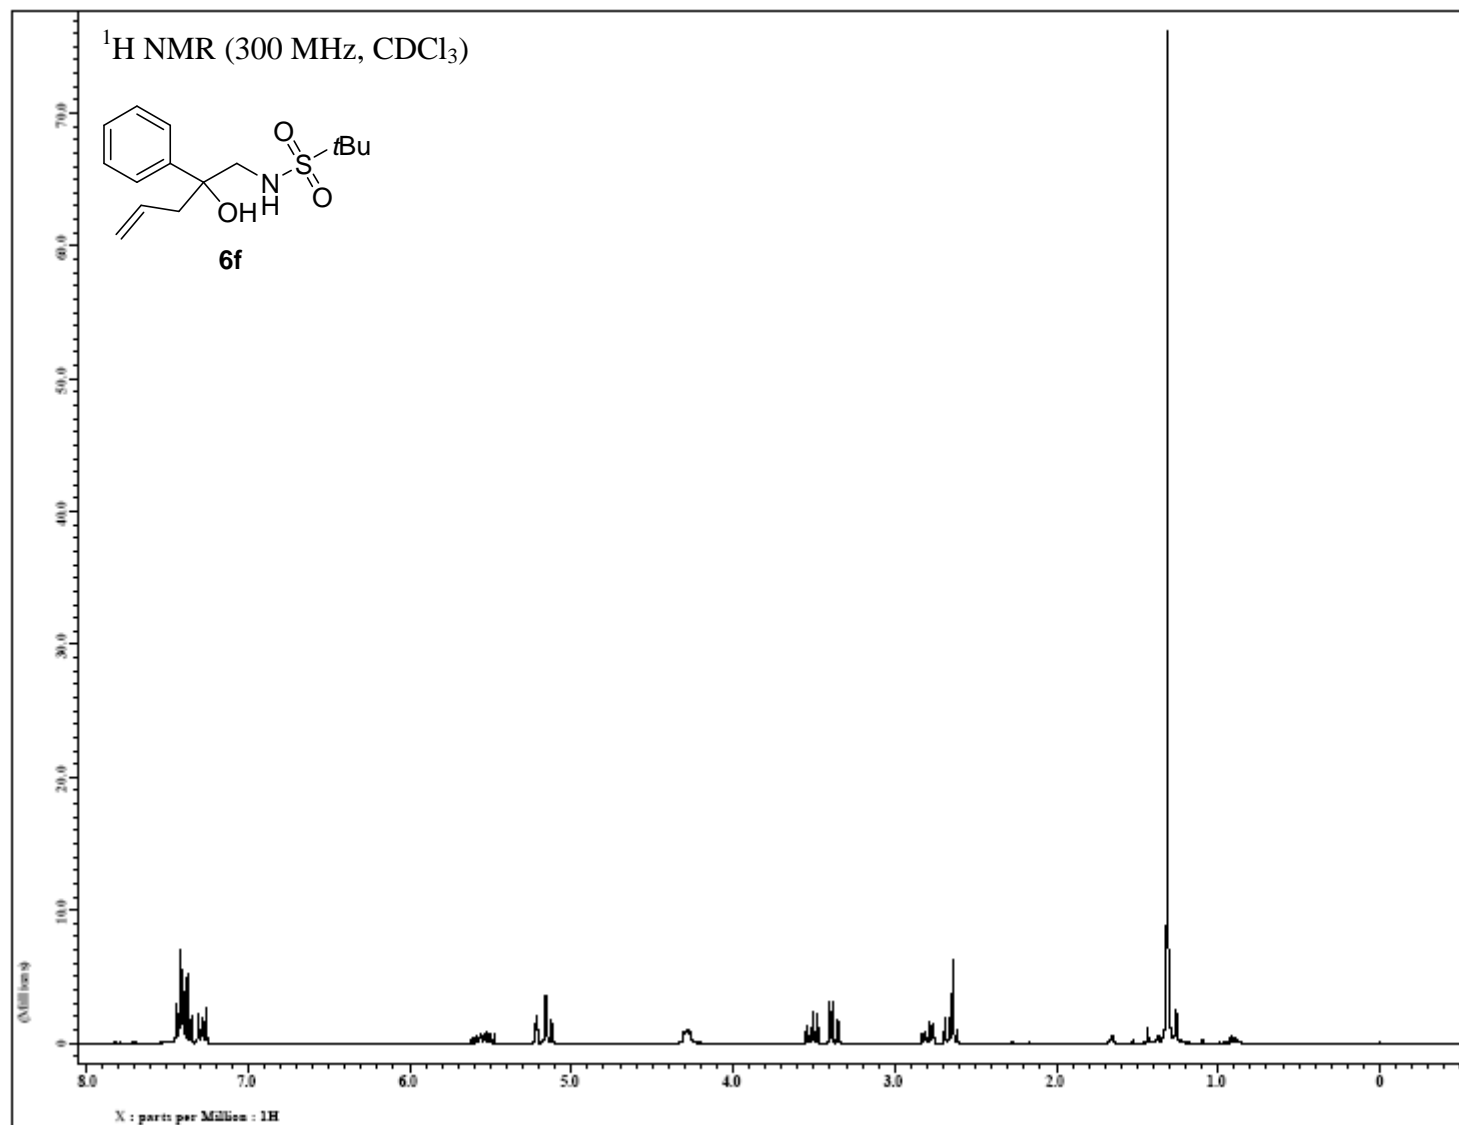

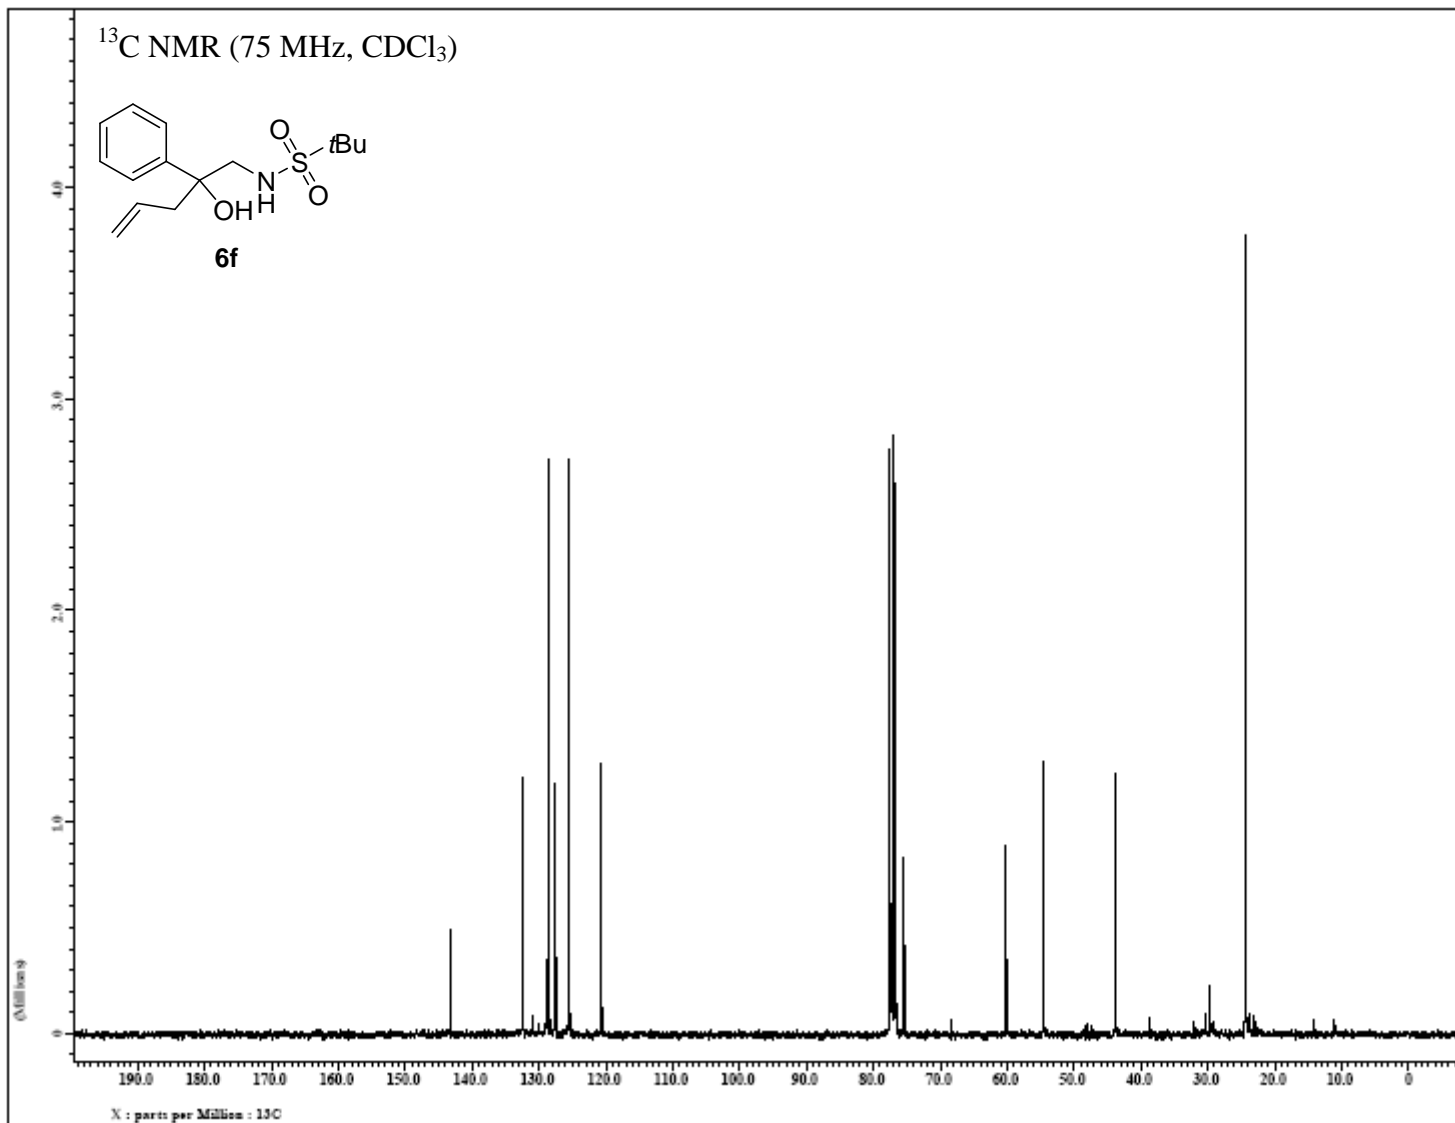

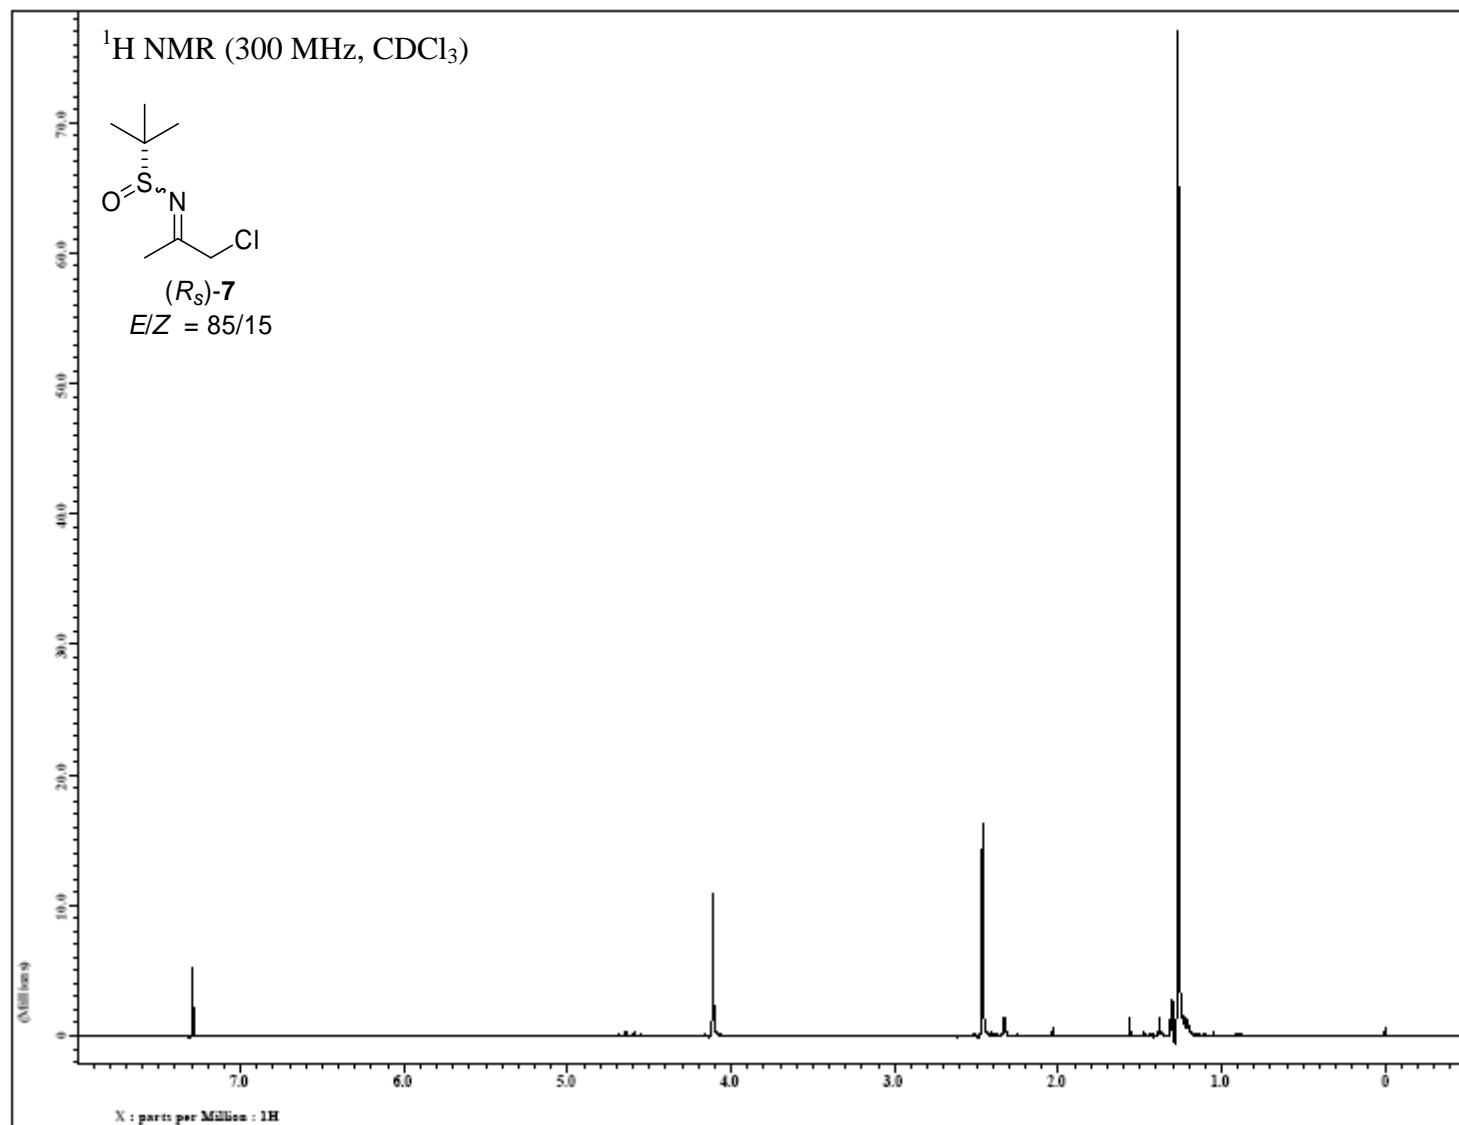



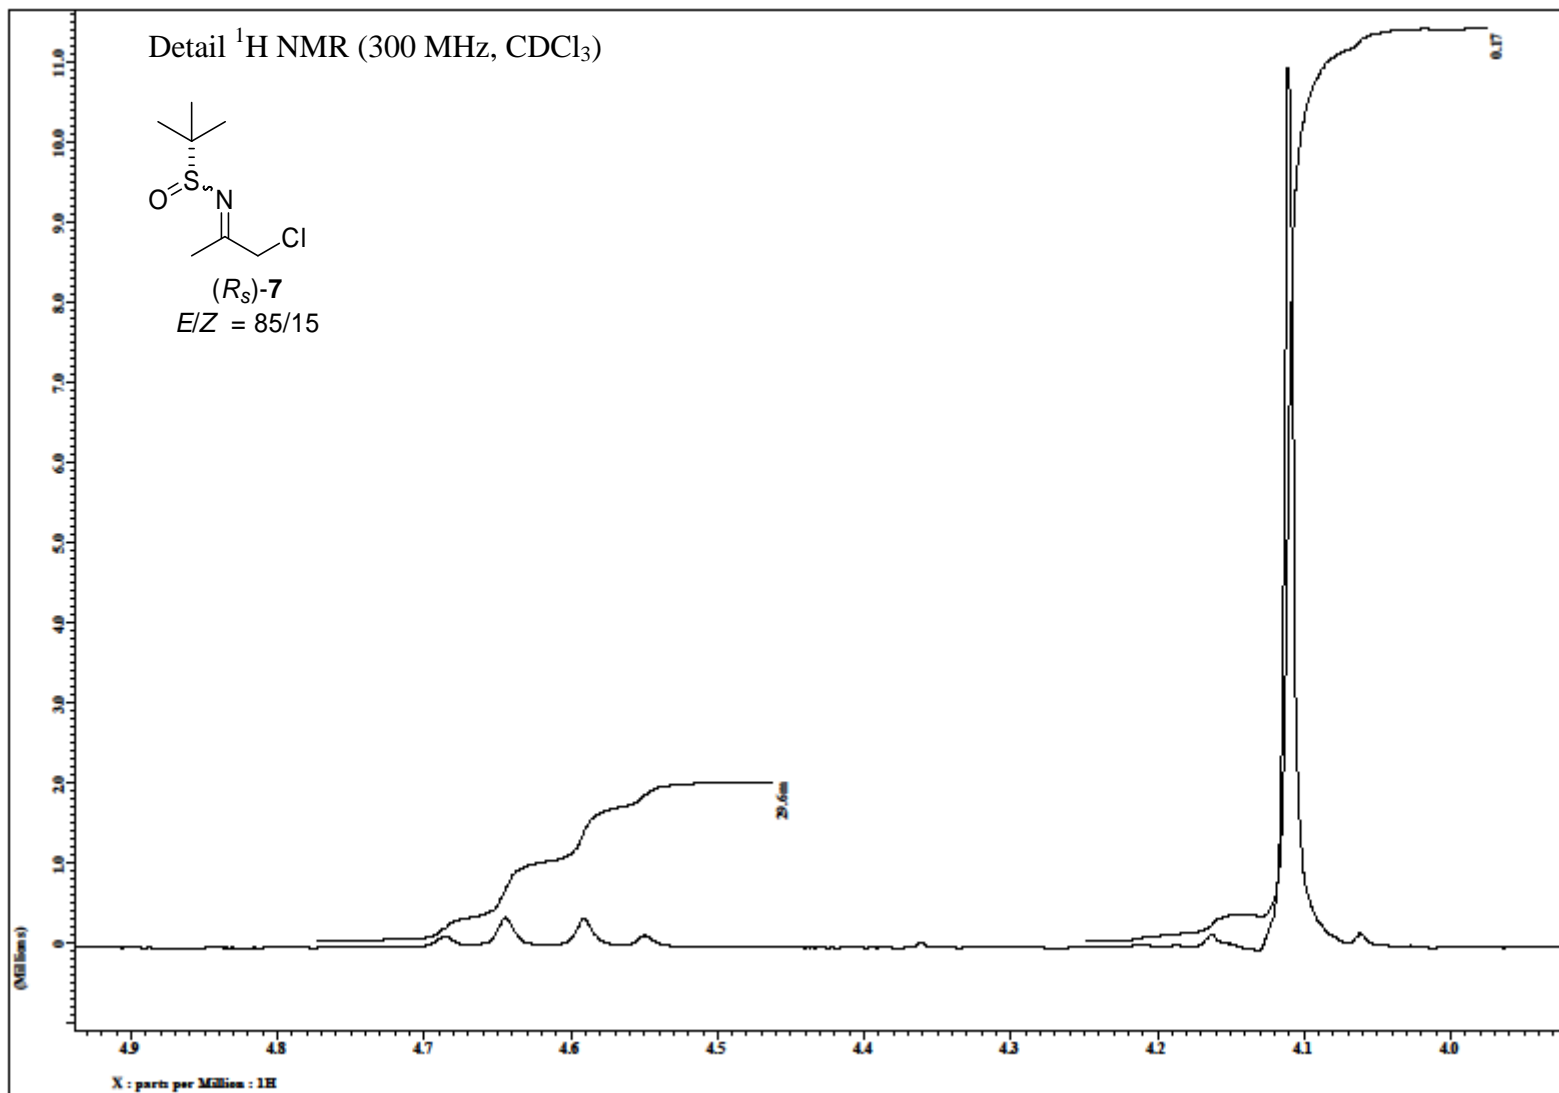

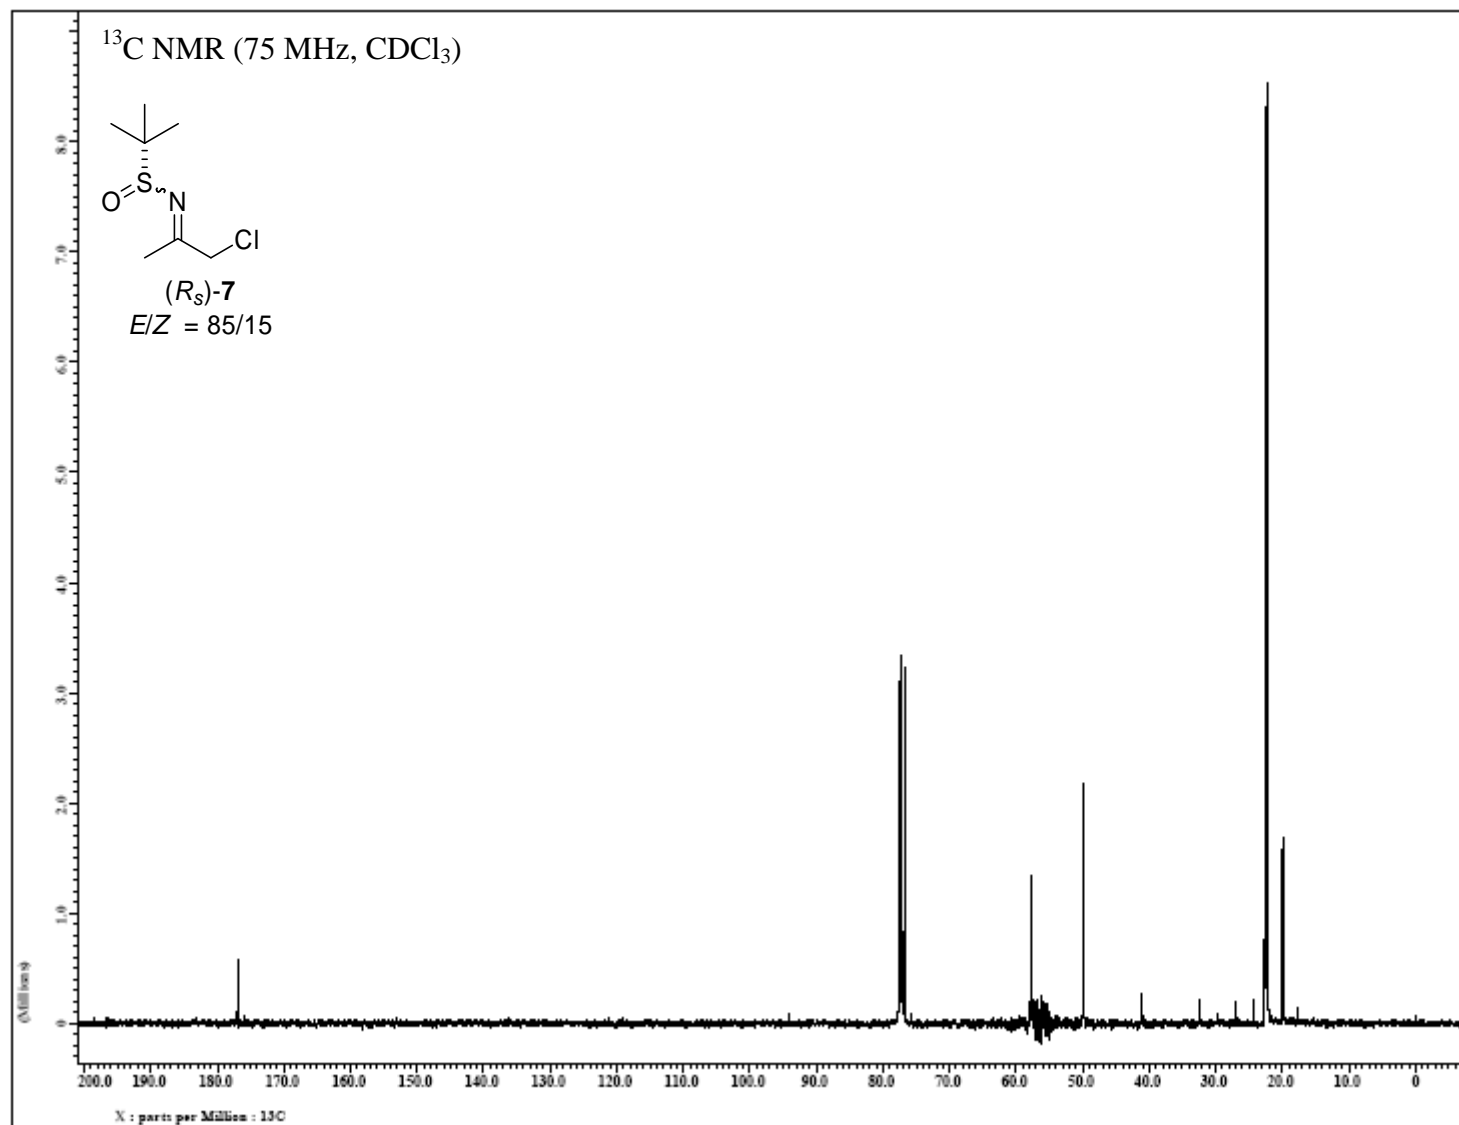

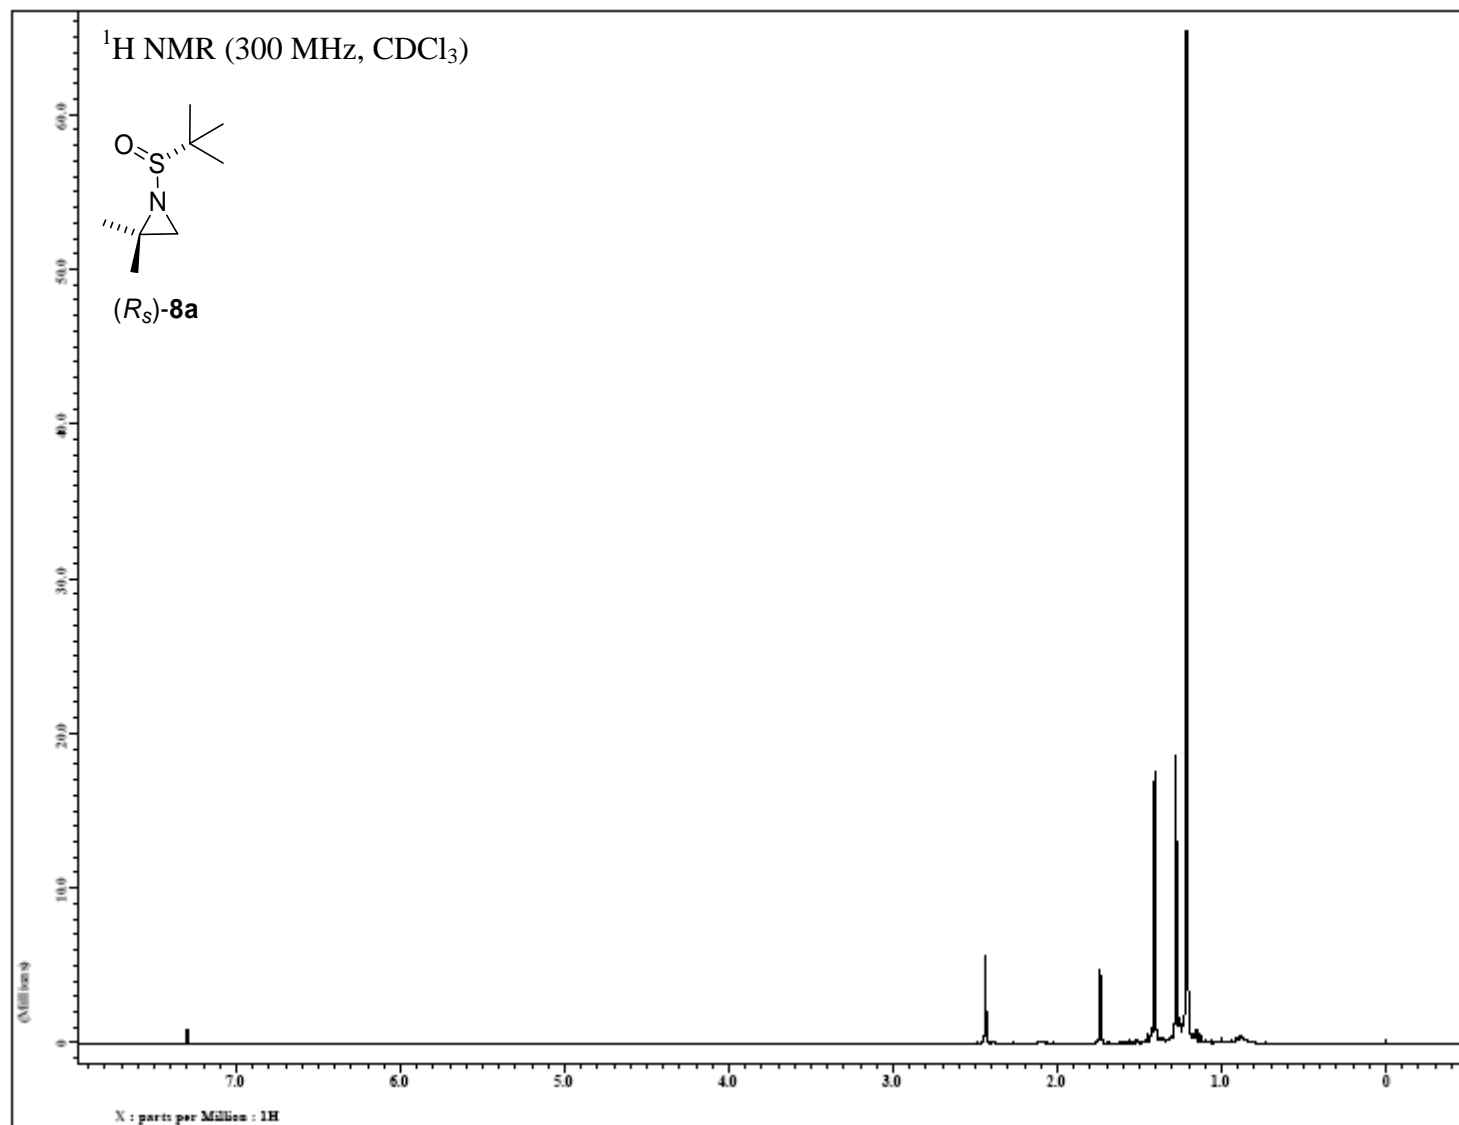

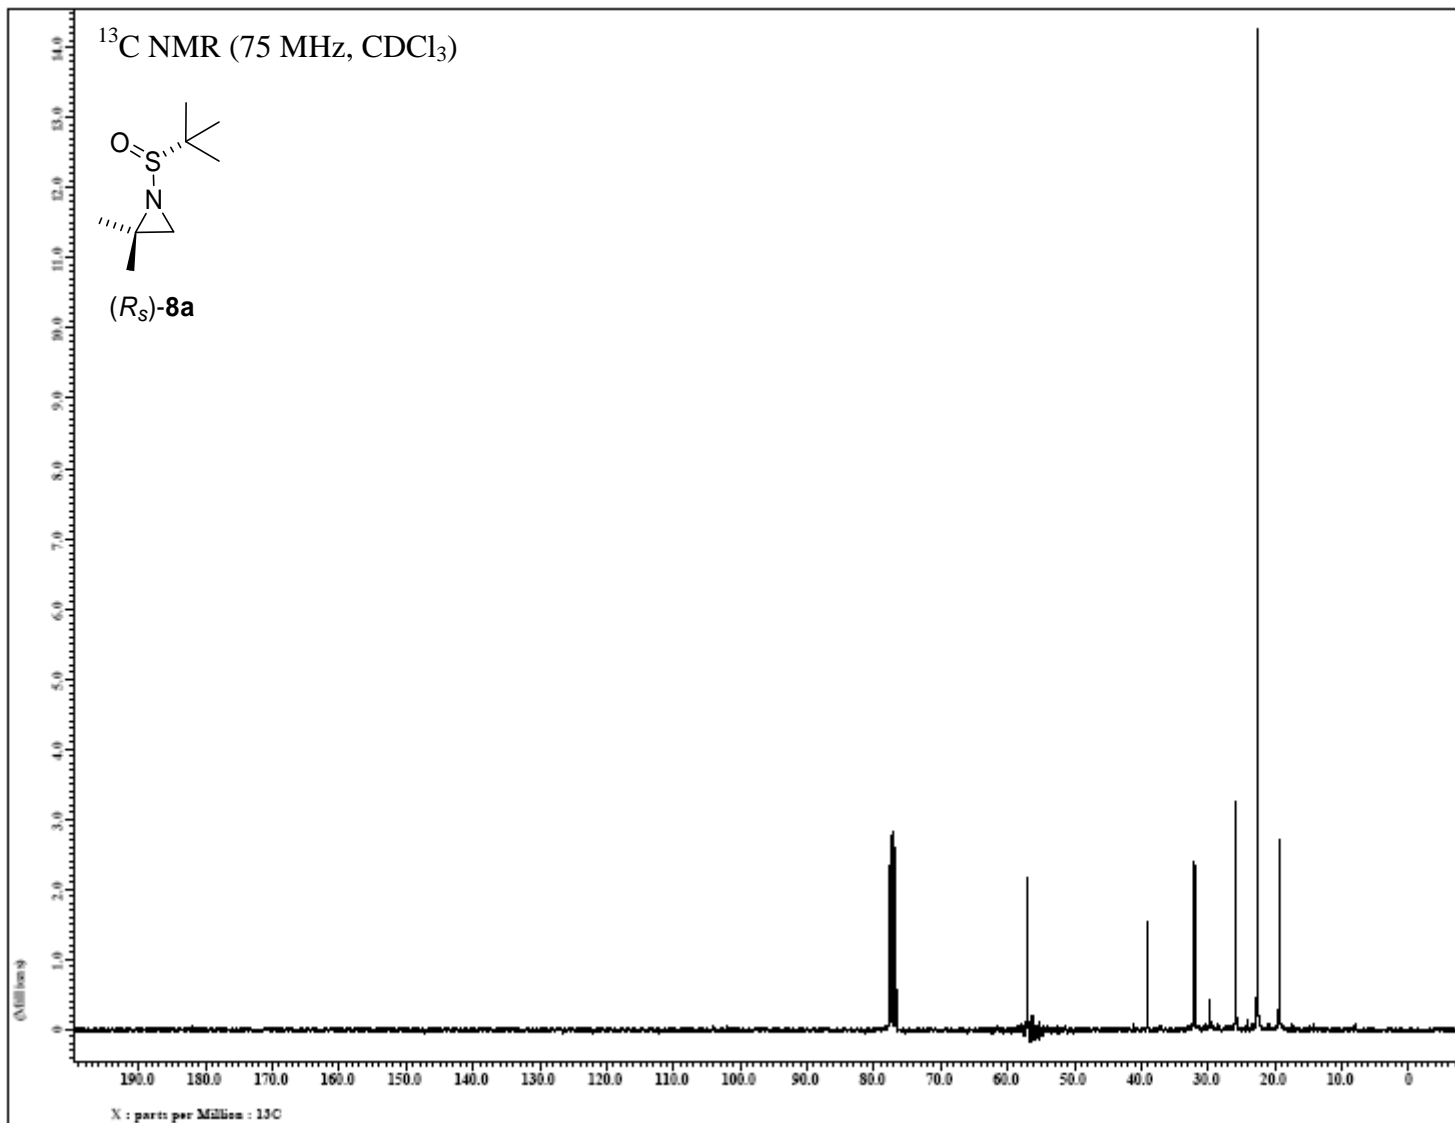

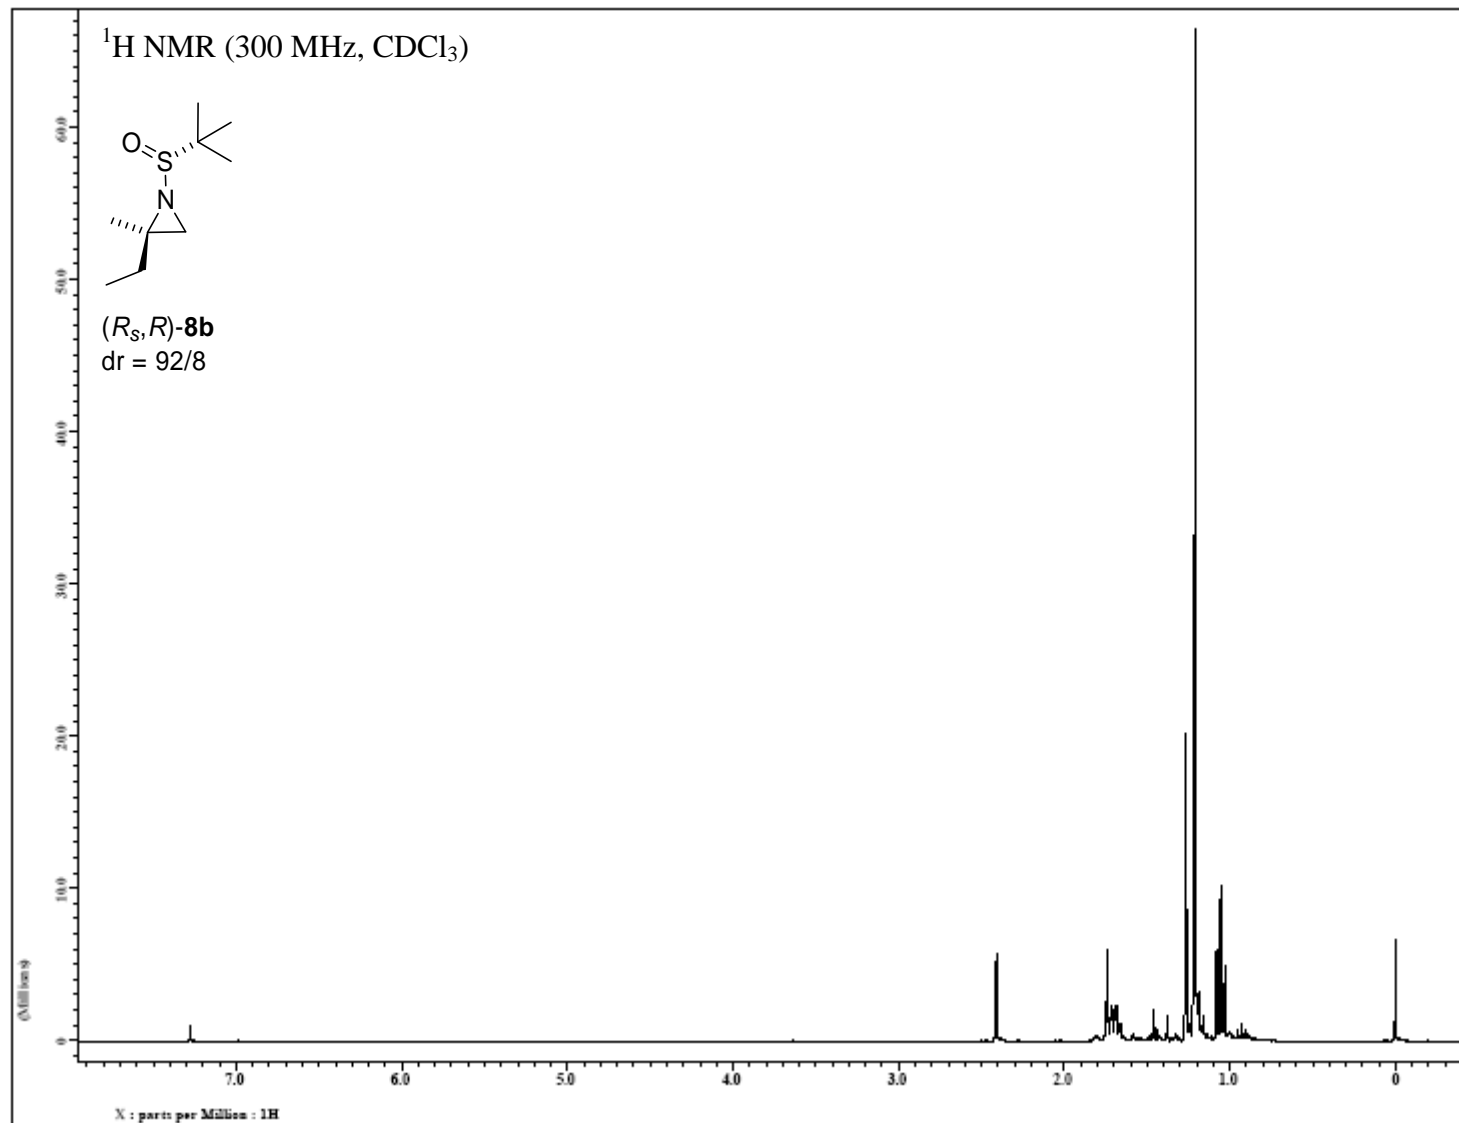

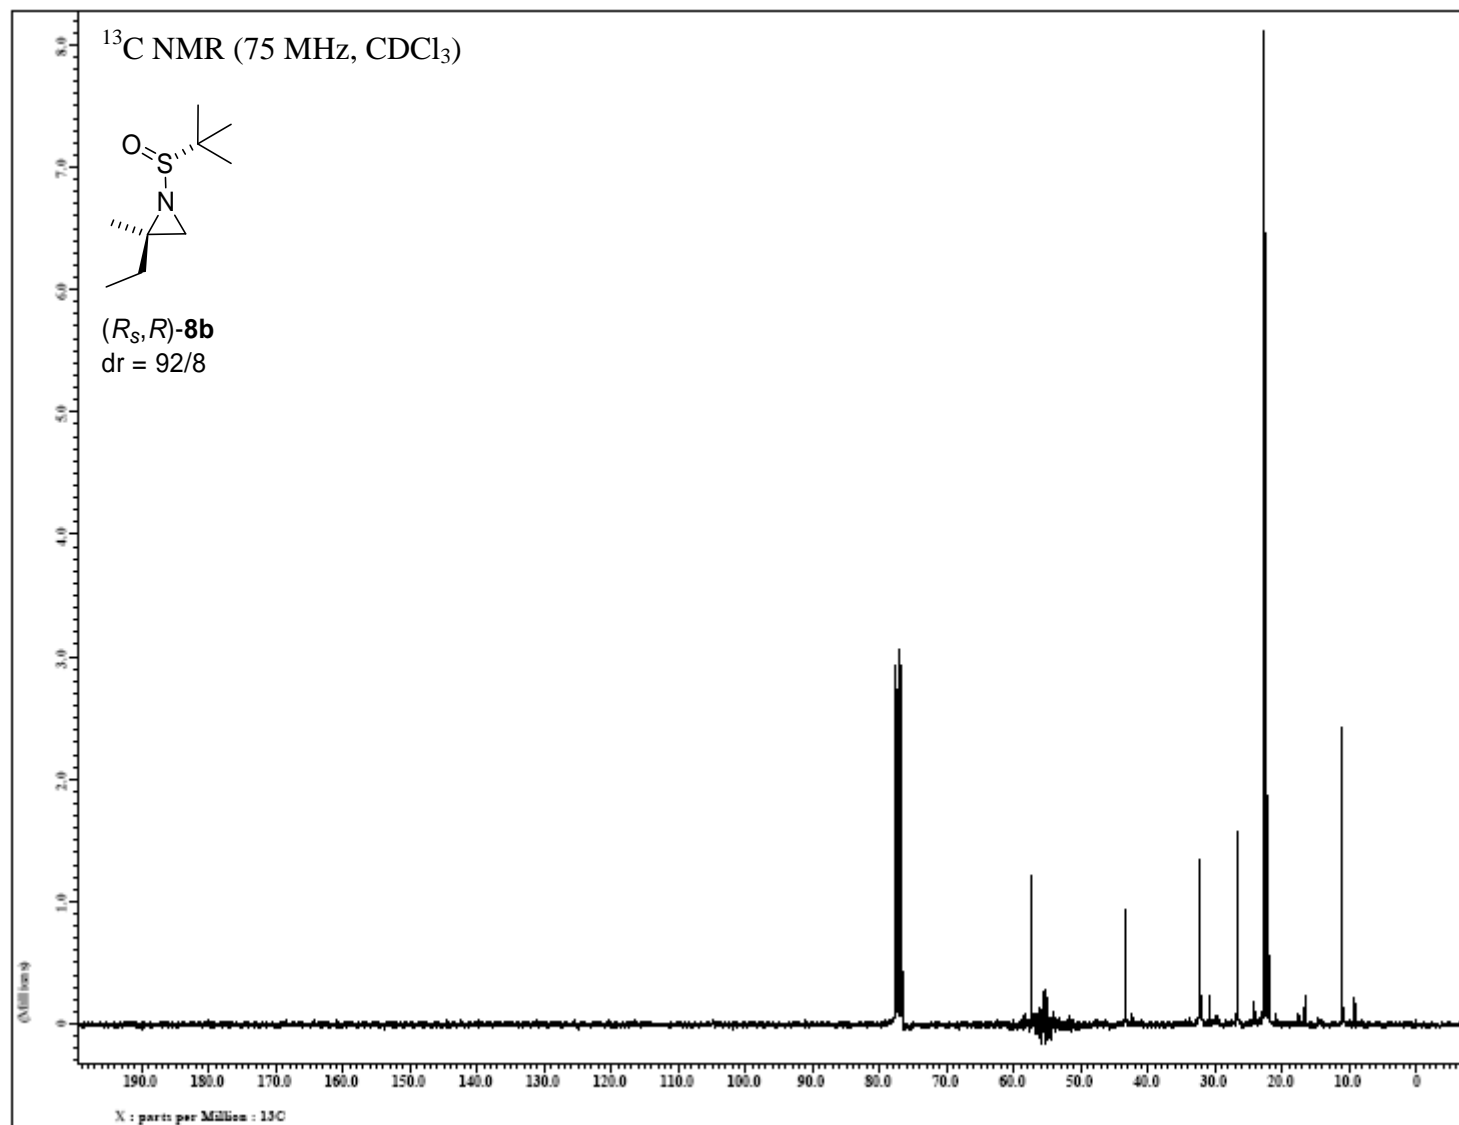

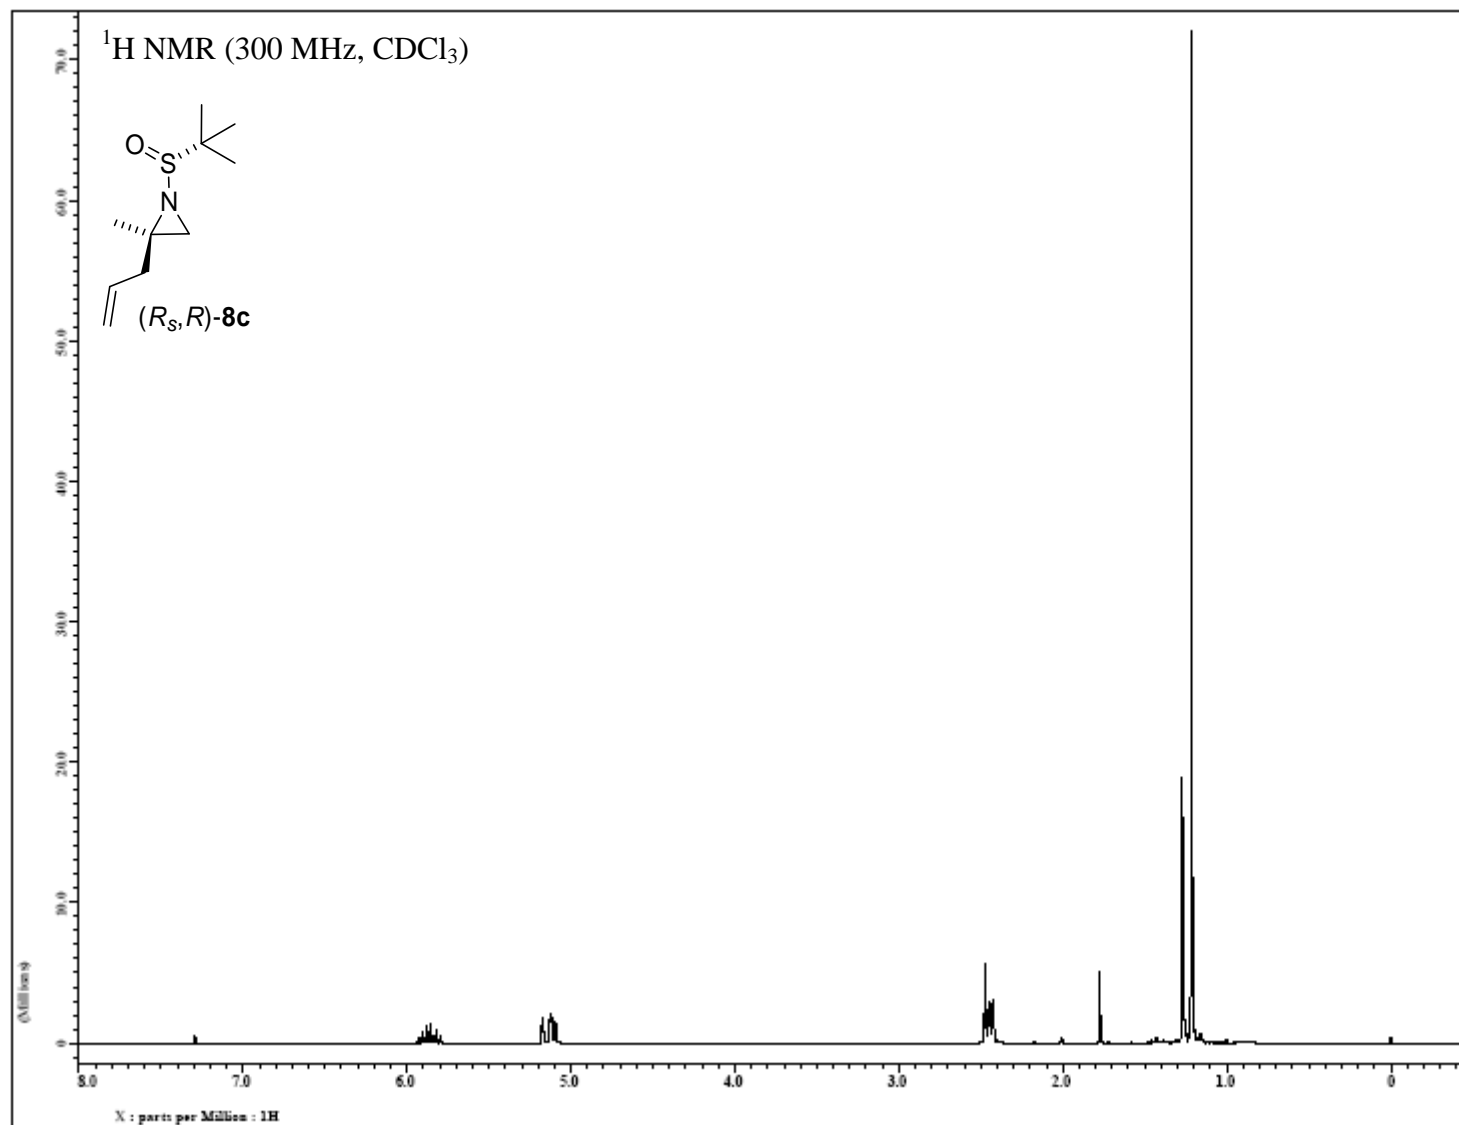

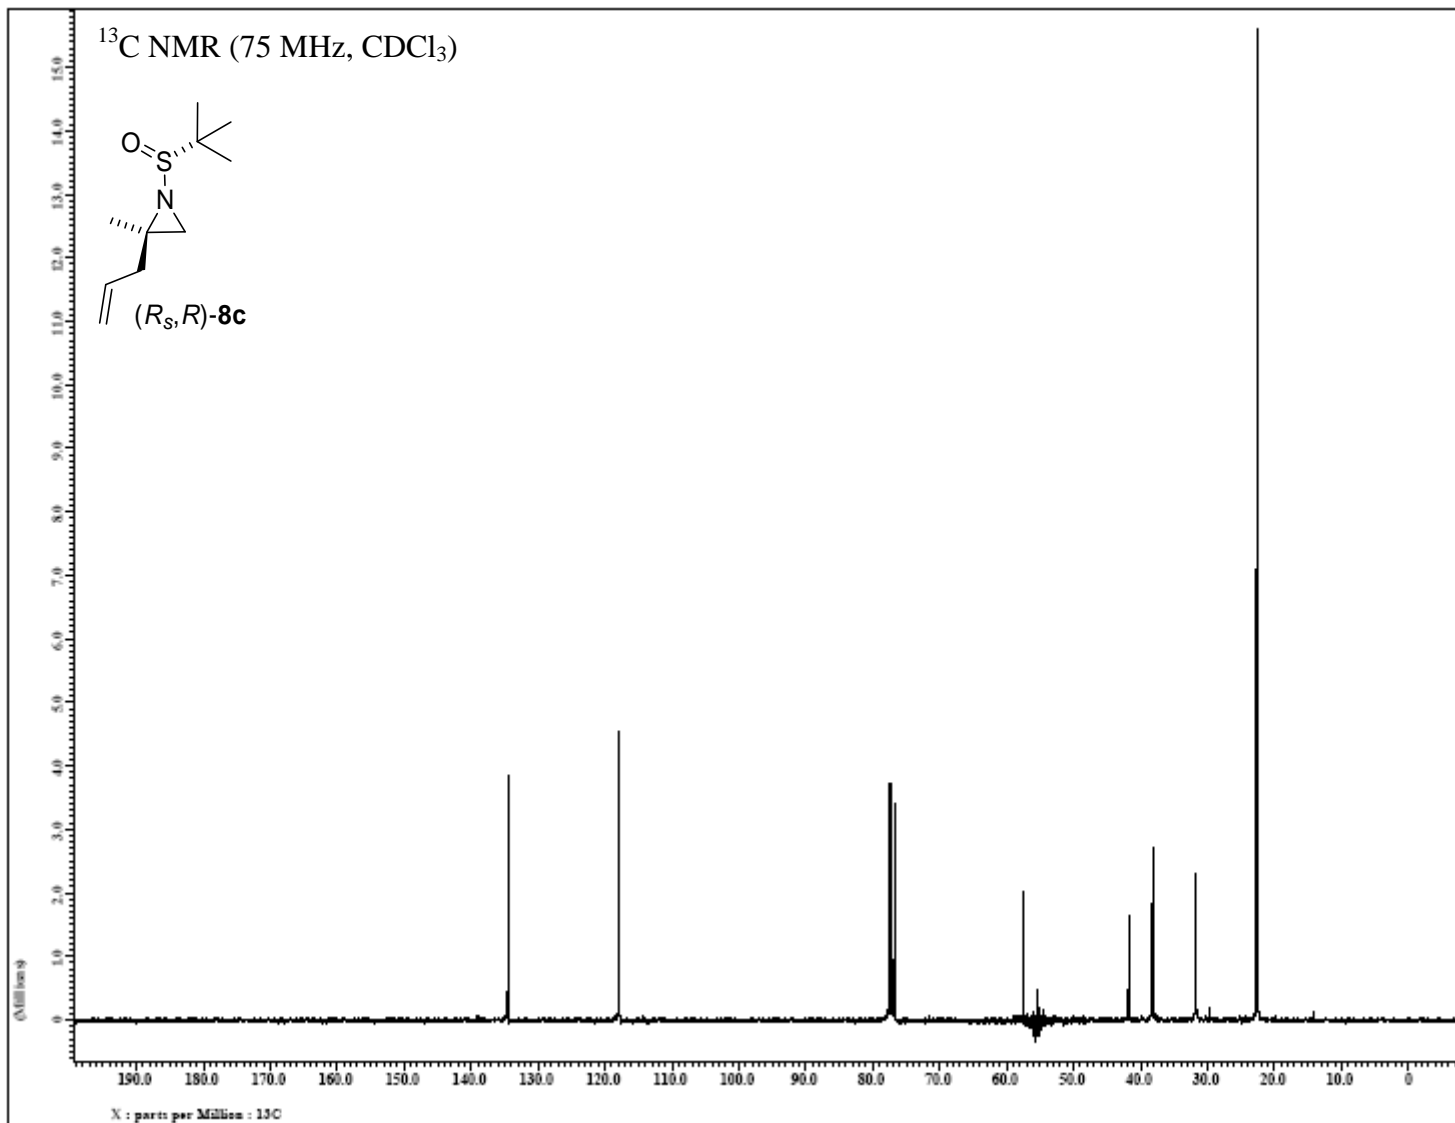

Supplement: c001471k.pdf [file c001471k.pdf]
